# Supplementary material for: Integrative proteomics in prostate cancer uncovers robustness against genomic and transcriptomic aberrations during disease progression
Source: PubMed Central journal article supplement (PMC5862881; doi:10.1038/s41467-018-03573-6), 2018-03-21
Supplement: 41467_2018_3573_MOESM1_ESM.pdf [file 41467_2018_3573_MOESM1_ESM.pdf]

Supplementary Information for:

Integrative proteomics in prostate cancer uncovers robustness against genomic and transcriptomic aberrations during disease progression

Latonen et al.

**a****Protein class**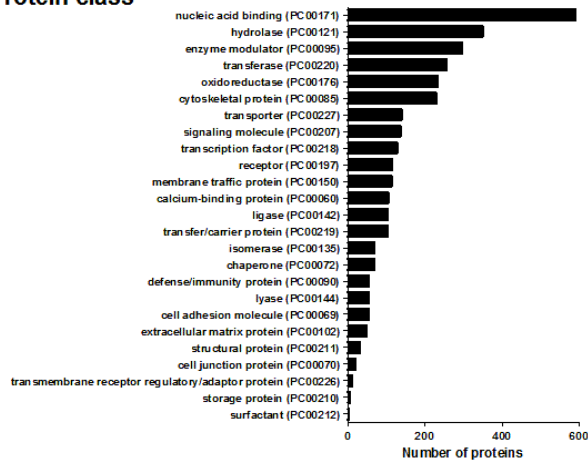**Molecular function**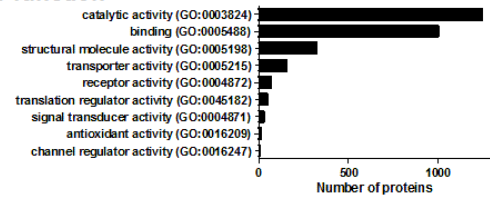**Cellular component**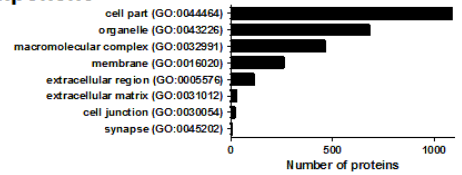**Biological process**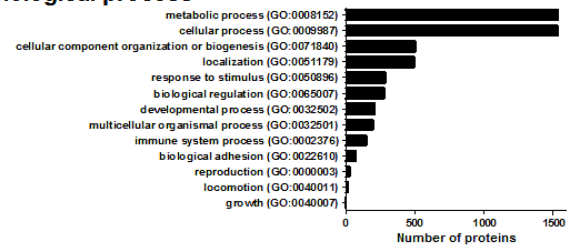**b**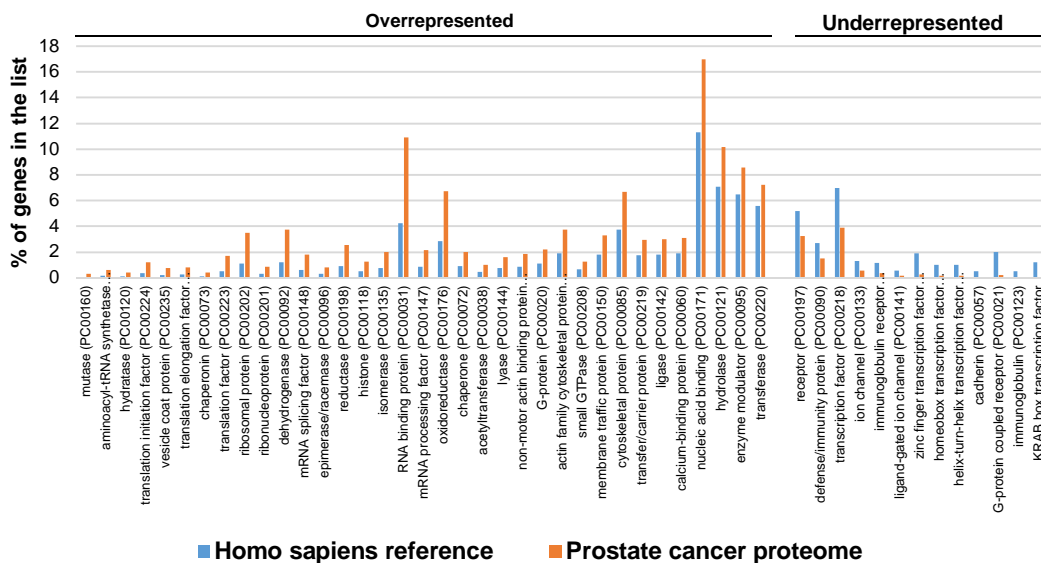**Supplementary Figure 1. Classification of proteins identified in the mass spectrometric analysis.**

**a** Major protein classes of the proteins identified in the BPH, PC, and CRPC samples by the SWATH-MS analysis. Proteins are grouped based on their major protein class (PANTHER protein class) and gene ontology groups (GO; molecular functions, cellular components, and biological processes). **b** The over- and underrepresented protein classes and subclasses as compared to *Homo sapiens* reference list according to PANTHER analysis. It must be noted that a single protein can belong to several of the presented groups and subgroups (e.g. proteins in the group of homeobox transcription factors belong also to the groups of helix-turn-helix transcription factors and transcription factors).

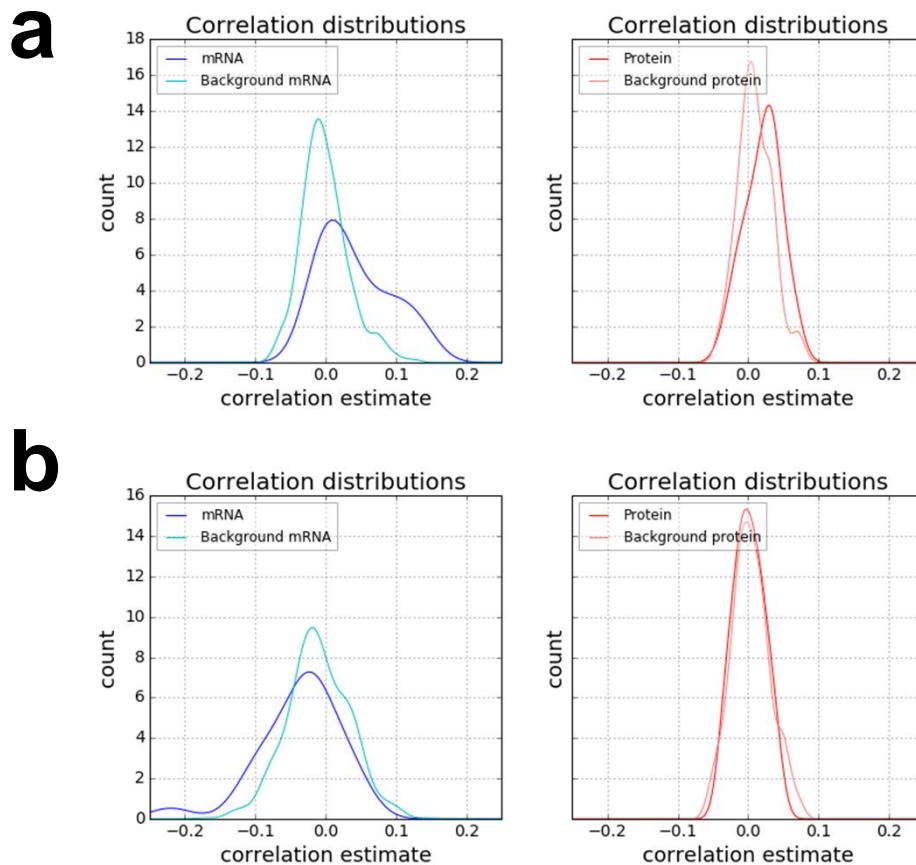

**Supplementary Figure 2. Observed global correlation patterns are driven biologically as opposed to mere chance. a)** left panel: correlation distribution of mRNA expression and gene copy number and its null distribution; right panel: correlation distribution of protein expression and gene copy number and its null distribution. **b)** left panel: correlation distribution of mRNA and DNA methylation and its null distribution; right panel: correlation distribution of protein expression and DNA methylation and its null distribution.

**a**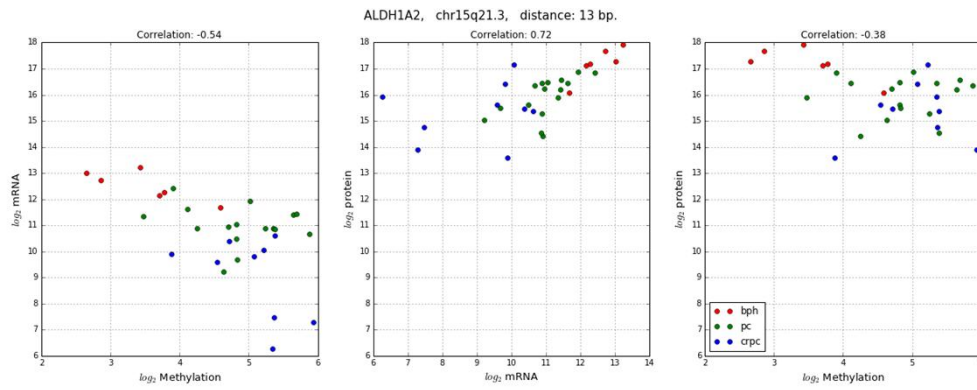**b**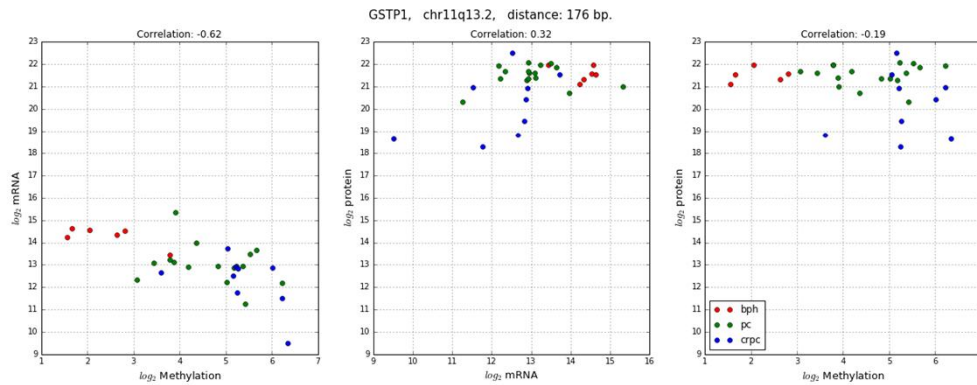**c**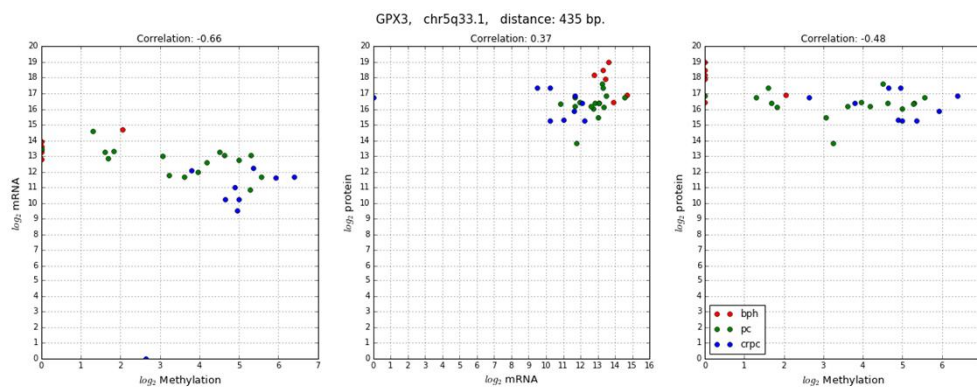**d**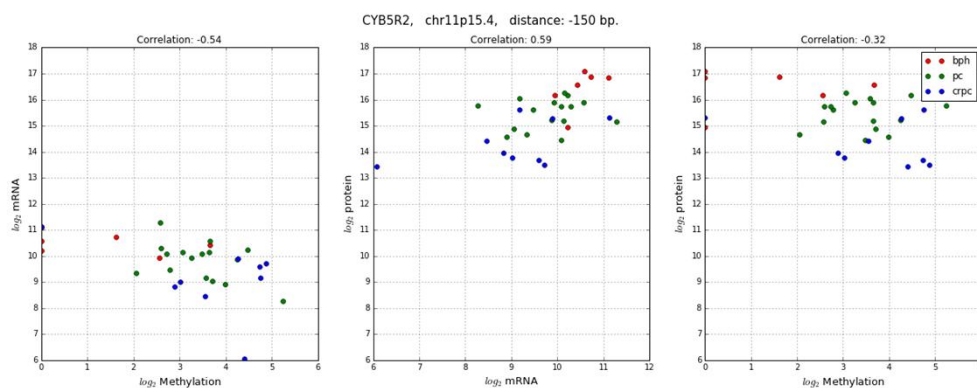

**Supplementary Figure 3. Examples of previously known genes whose DNA methylation is increased in prostate cancer, correlating with decreased expression at the RNA and protein levels.** Correlation between mRNA expression level and DNA methylation (left panels), protein expression and mRNA expression levels (middle panels) and protein expression and DNA methylation levels (right panels) of **a)** ALDH1A2, **b)** GSTP1, **c)** GPX3, and **d)** CYB5R2. Chromosome locations of the genes, and the DMR distance from TSS are shown. Correlation values are shown above each graph.

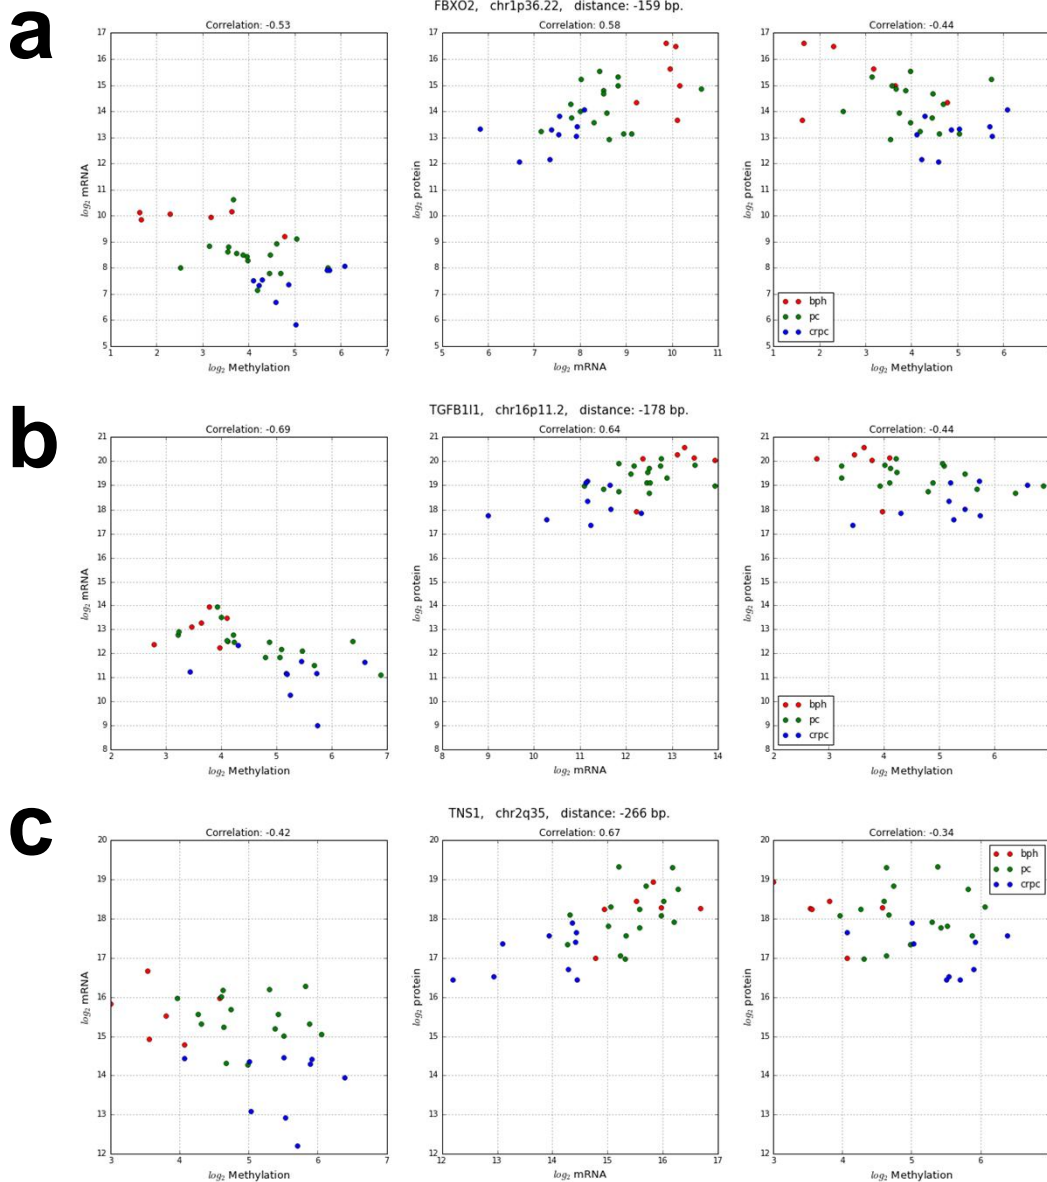

**Supplementary Figure 4. Examples of genes whose promoter DNA methylation is increased in prostate cancer, correlating with decreased expression at the RNA and protein levels.** Correlation between mRNA expression level and DNA methylation (left panels), protein expression and mRNA expression levels (middle panels) and protein expression and DNA methylation levels (right panels) of **a)** FBXO2, **b)** TGFB111, and **c)** TNS1. Chromosome locations of the genes, and the DMR distance from TSS are shown. Correlation values are shown above each graph.

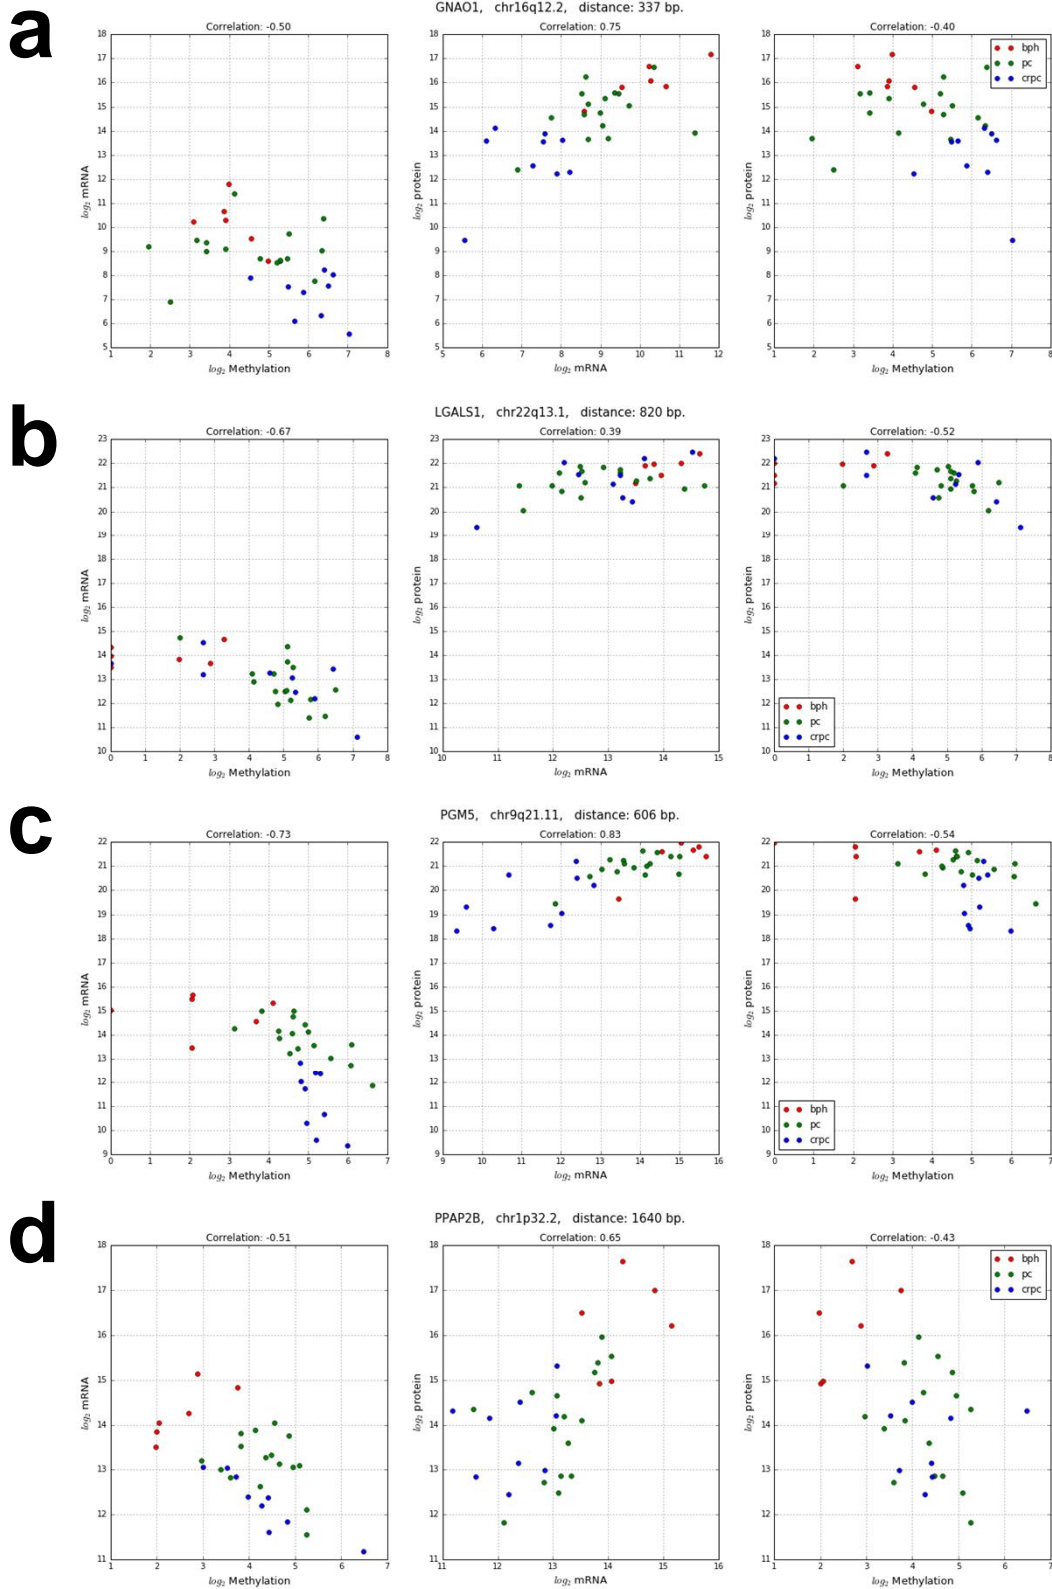

**Supplementary Figure 5. Examples of genes whose gene body DNA methylation is increased in prostate cancer, correlating with decreased expression at the RNA and protein levels.** Correlation between mRNA expression level and DNA methylation (left panels), protein expression and mRNA expression levels (middle panels) and protein expression and DNA methylation levels (right panels) of **a) GNAO1**, **b) LGALS1**, **c) TNS1**, and **d) PPAP2B**. Chromosome locations of the genes, and the DMR distance from TSS are shown. Correlation values are shown above each graph.



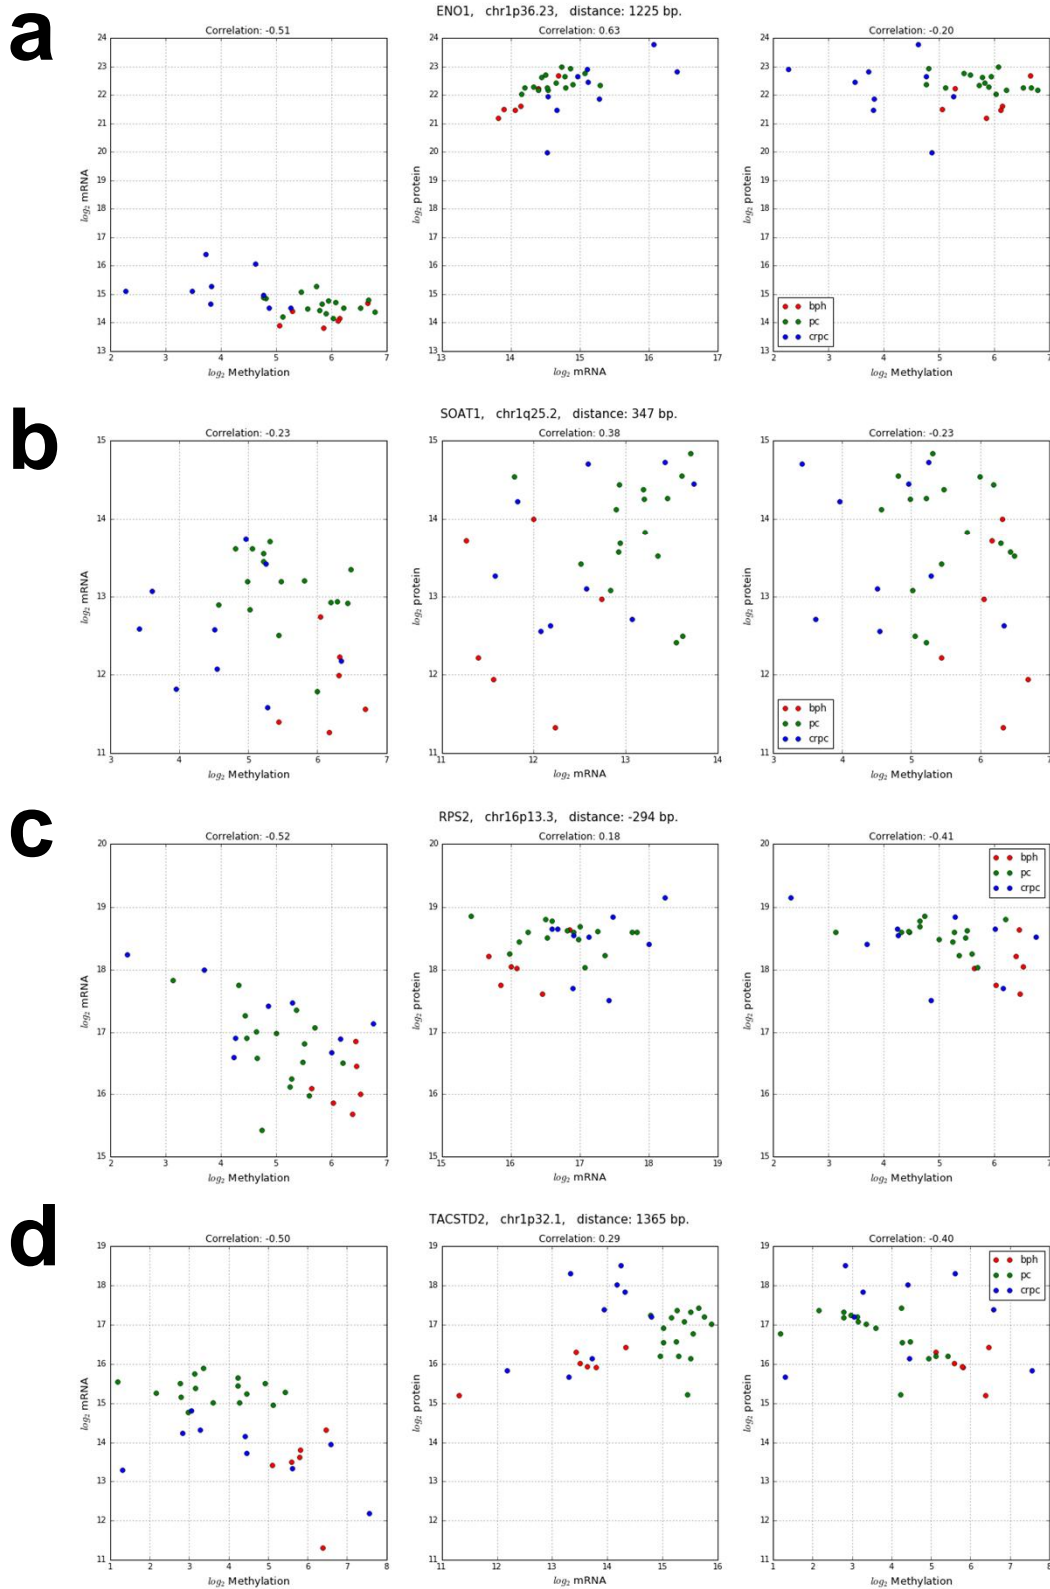

**Supplementary Figure 6. Examples of genes whose DNA methylation is decreased in prostate cancer, correlating with increased expression at the RNA and protein levels.** Correlation between mRNA expression level and DNA methylation (left panels), protein expression and mRNA expression levels (middle panels) and protein expression and DNA methylation levels (right panels) of **a)** ENO1, **b)** SOAT1, **c)** RPS2, and **d)** TACSTD2. Chromosome locations of the genes, and the DMR distance from TSS are shown. Correlation values are shown above each graph.

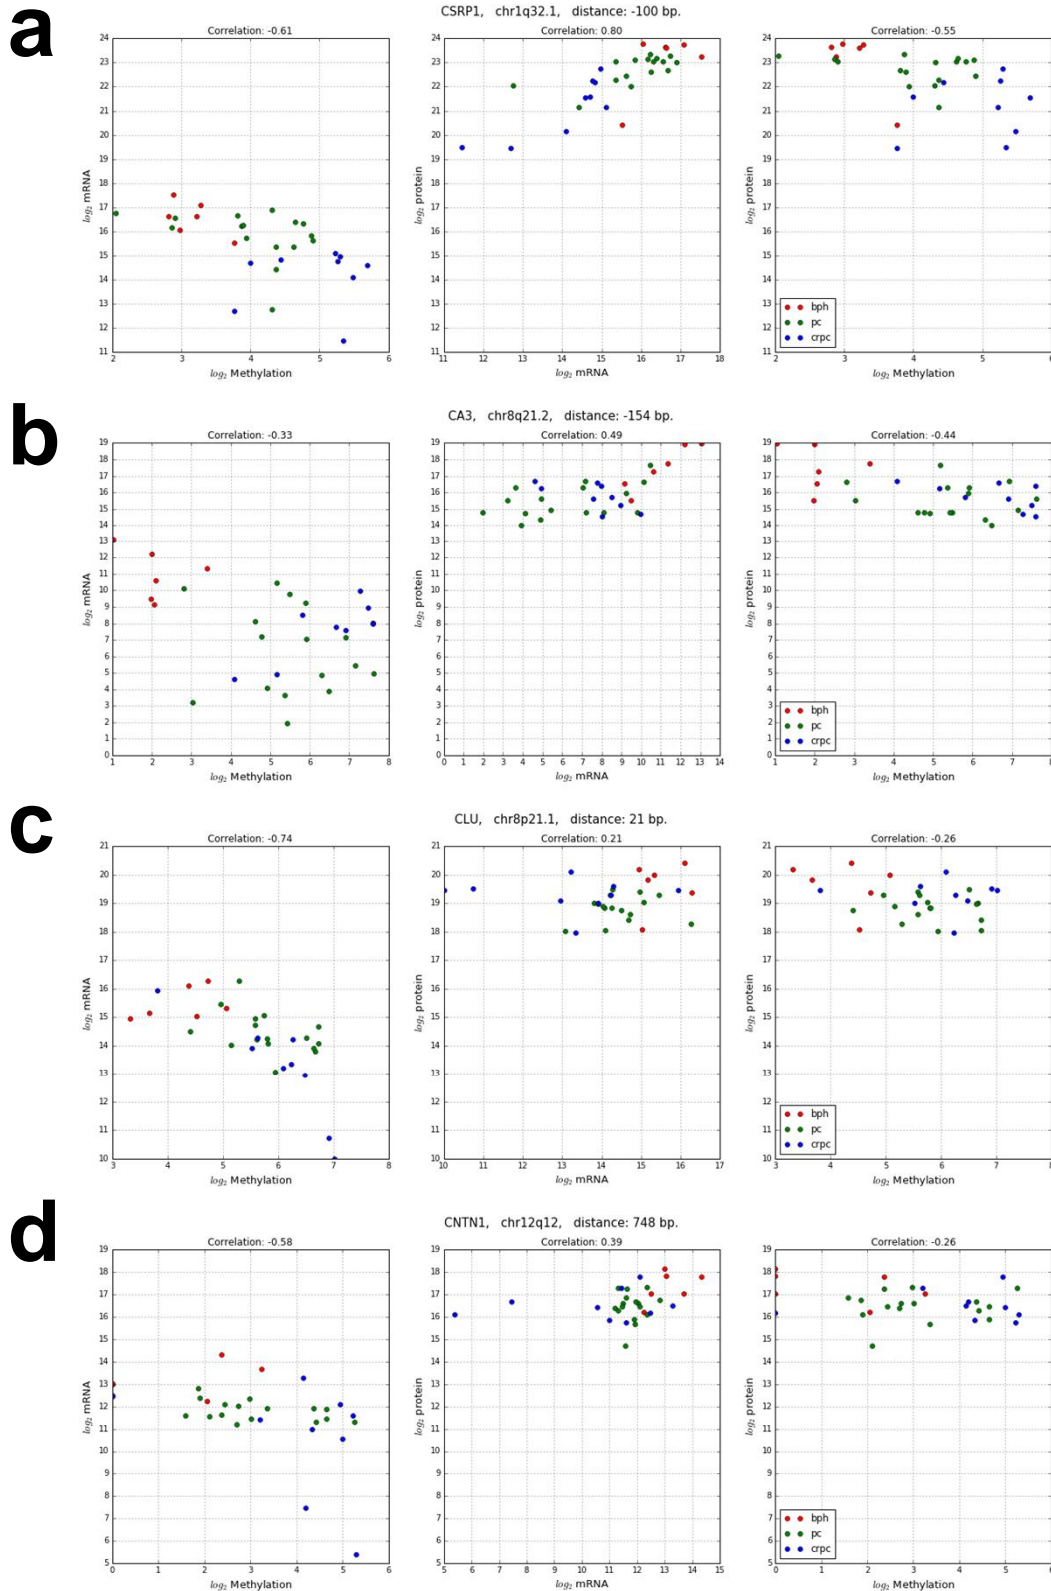

**Supplementary Figure 7. Examples of genes whose DNA methylation is increased in prostate cancer samples without an effect to protein levels in cancer cells.** Correlation between mRNA expression level and DNA methylation (left panels), protein expression and mRNA expression levels (middle panels) and protein expression and DNA methylation levels (right panels) are shown for **a**) CSRP1, and **b**) CA3 expressed in stromal cells, as well as **c**) CLU, and **d**) CNTN1, protein expression of which does not correlate with increased DMR methylation or decreased RNA methylation. Chromosome locations of the genes, and the DMR distance from TSS are shown. Correlation values are shown above each graph.



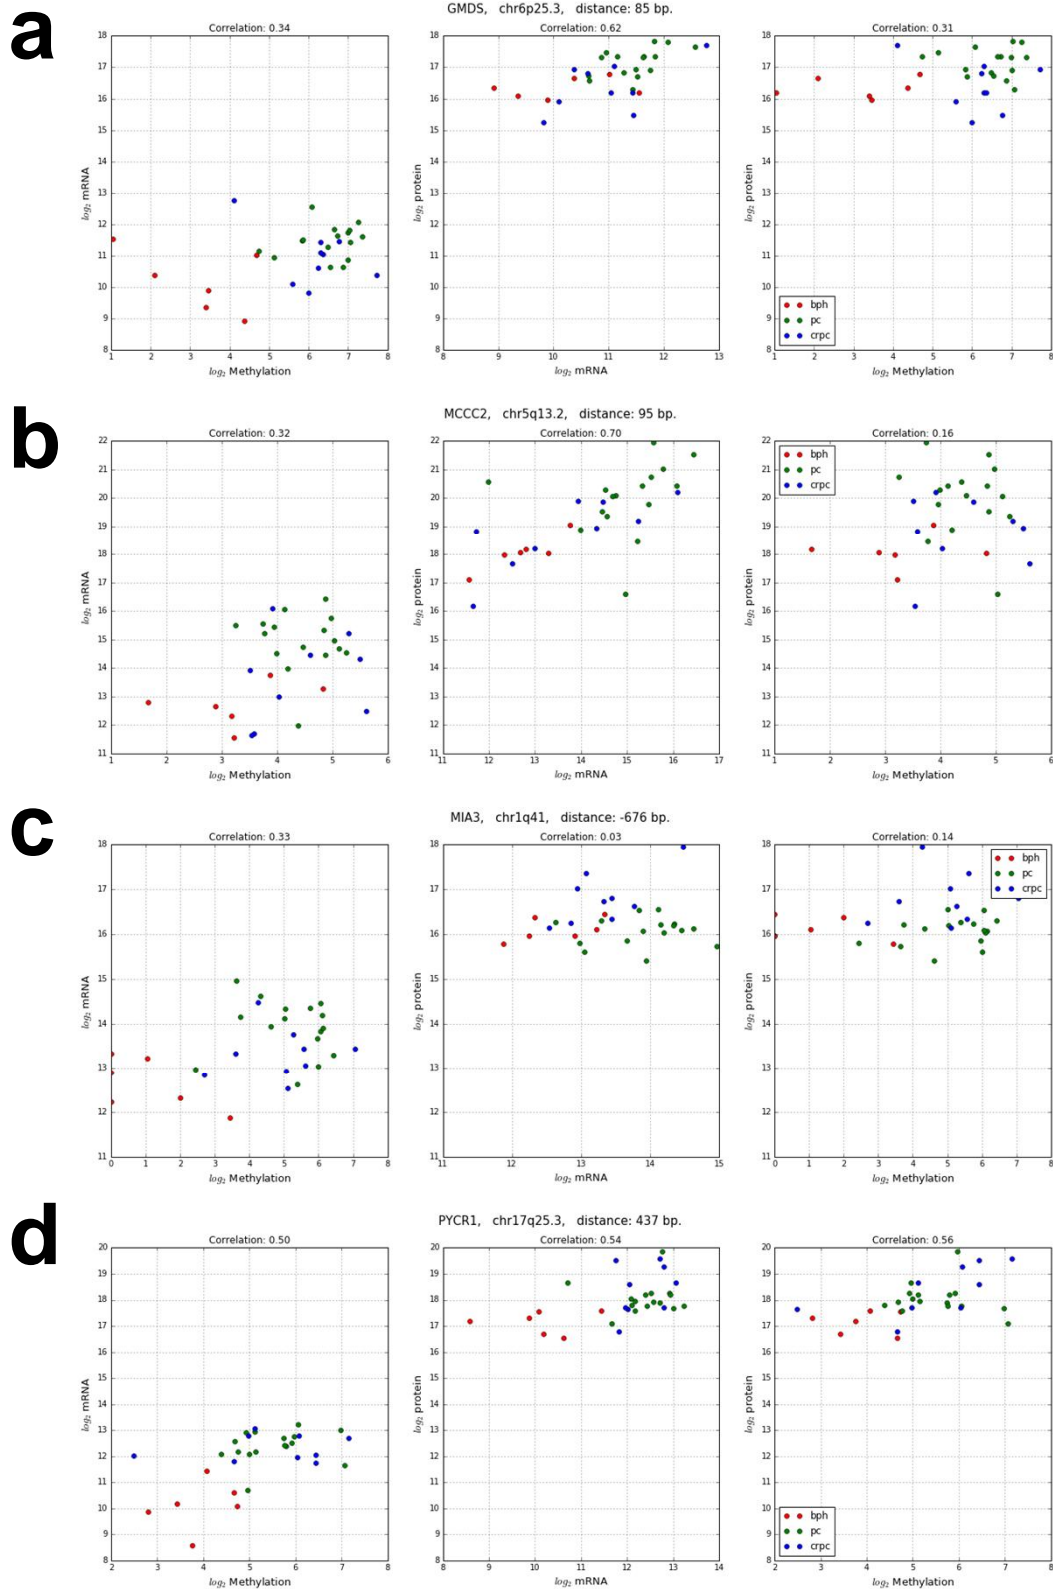

**Supplementary Figure 8. Examples of genes whose DNA methylation is increased in prostate cancer, correlating with increased expression at the RNA and protein levels.** Correlation between mRNA expression level and DNA methylation (left panels), protein expression and mRNA expression levels (middle panels) and protein expression and DNA methylation levels (right panels) of **a**) GMDS, **b**) MCCC2, **c**) MIA3, and **d**) PYCR1. Chromosome locations of the genes, and the DMR distance from TSS are shown. Correlation values are shown above each graph.

**a**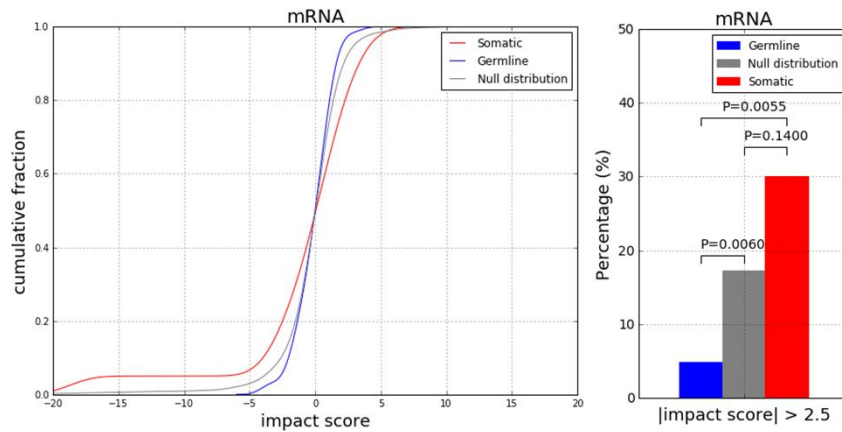**b**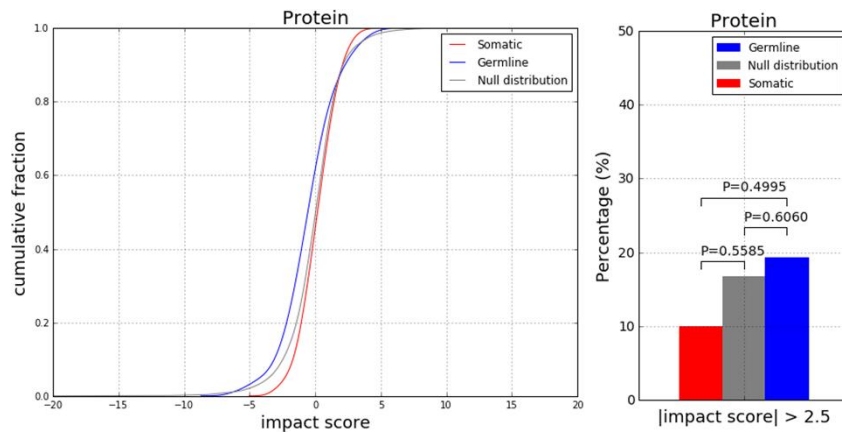

**Supplementary Figure 9. Impact of somatic and germline variants on mRNA and protein expression in prostate cancer. a)** Impact of mutations to mRNA expression levels and **b)** protein expression levels. Impact scores of somatic and germline variants compared to null distributions are shown in the panels on the left. Percentages of variants with absolute impact score above 2.5 and significances between mutation groups assessed by Fisher's exact test are shown in the panels on the right.

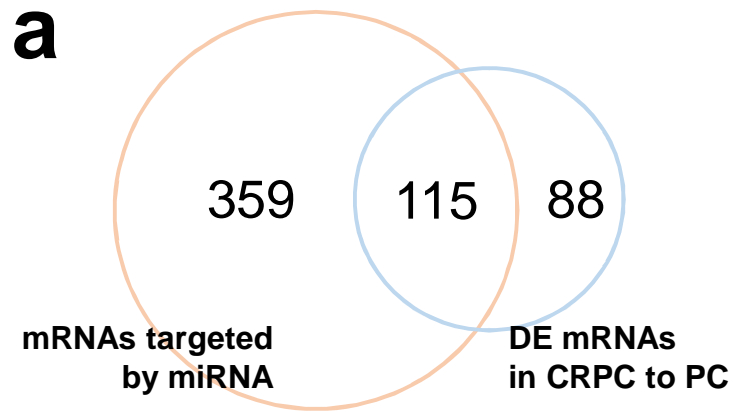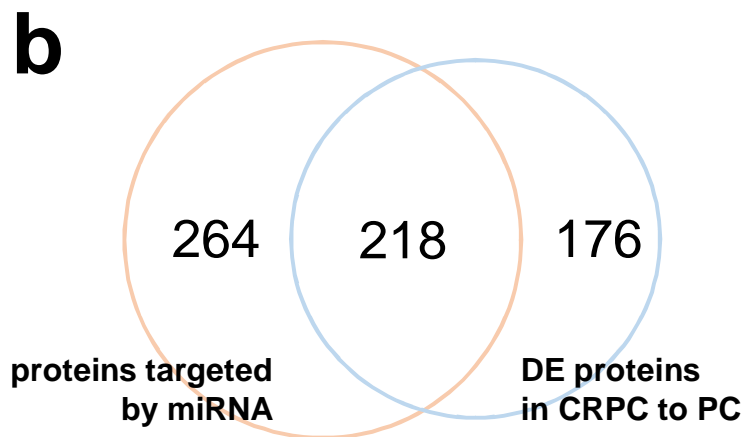

**Supplementary Figure 10. Analysis of miRNA targets from differentially expressed pools of mRNA and protein during prostate cancer progression. a)** Overlap between mRNAs that are potential targets of an negatively correlating miRNA, and the pool of differentially expressed mRNAs in CRPC to PC comparison. The overlapping 115 genes represent the pool of genes that may be regulated by the targeting miRNAs via mRNA degradation during prostate cancer progression. **b)** Overlap between proteins that are potential targets of an negatively correlating miRNA, and the pool of differentially expressed proteins in CRPC to PC comparison. The overlapping 218 genes represent the pool of genes that may be regulated by the targeting miRNAs via inhibition of translation (i.e. w/o mRNA degradation) during prostate cancer progression.

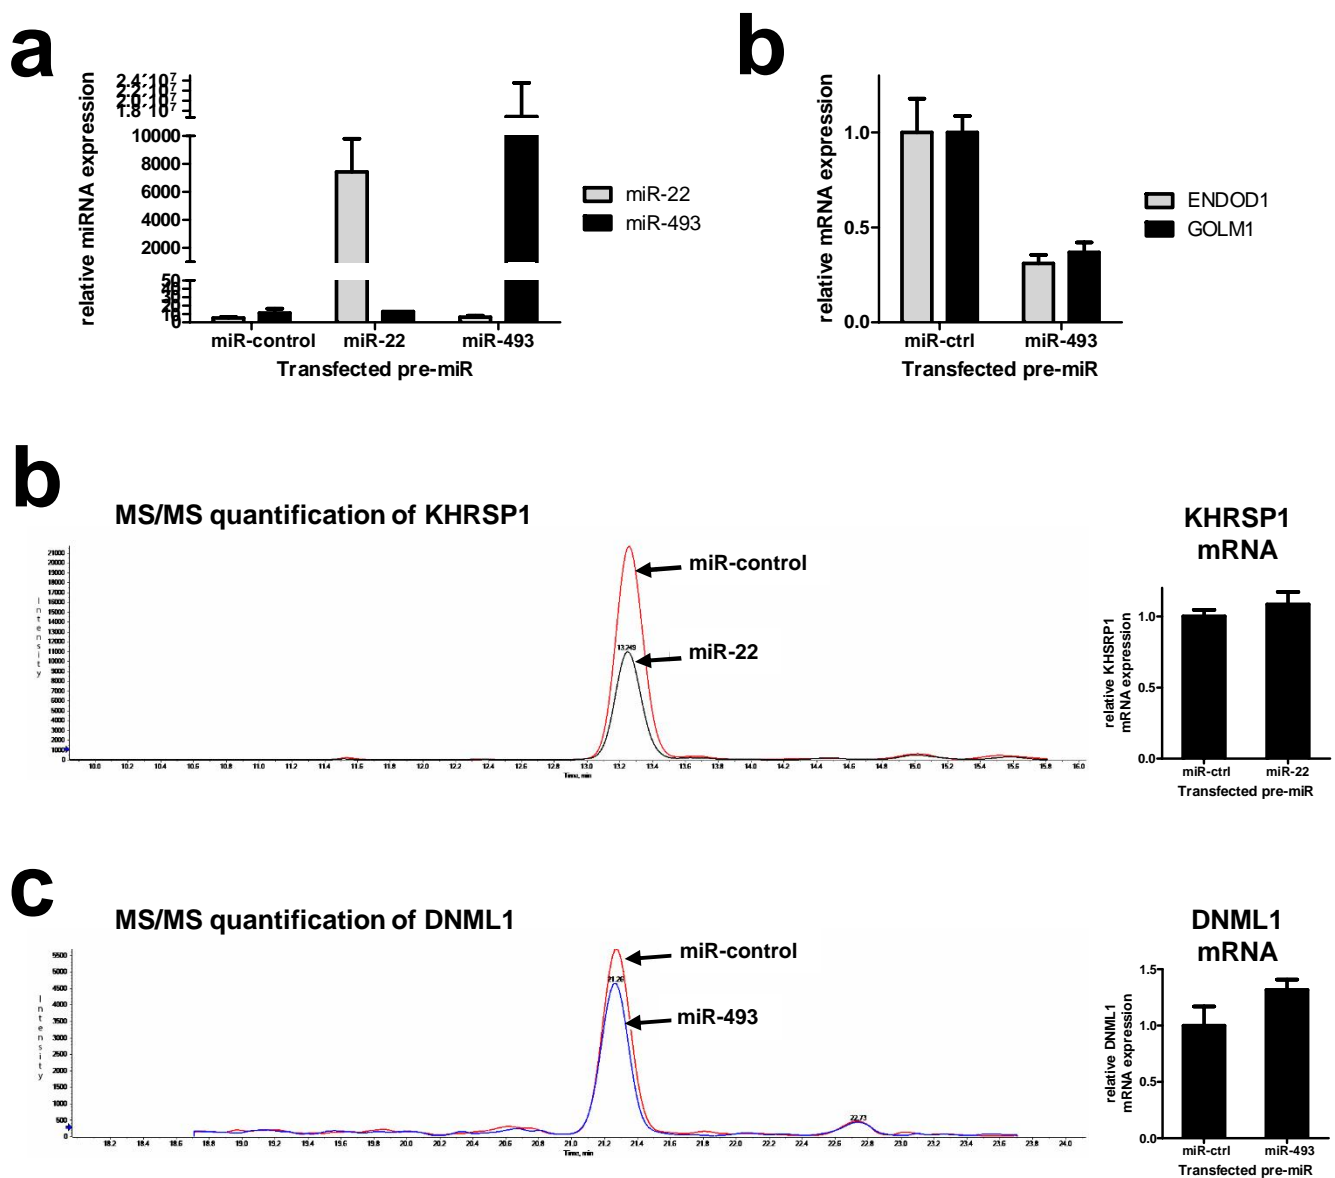

**Supplementary Figure 11. Verification of predicted miRNA-target pairs found significantly regulated in prostate cancer.** Examples of predicted miRNA-target pairs having negative correlation based on either transcriptomic or proteomic analyses were verified by assessing mRNA and protein levels of the targets in PC-3 cells transfected with pre-miRNA constructs. **a)** Successful transfections and expressions of the transfected miRNAs were verified by TaqMan microRNA RT-qPCR assays. **b)** Expression of two predicted miR-493 targets, ENDOD1 and GOLM1, which showed negative correlations with miR-493 expression in transcriptome-based analysis, were found to be significantly decreased at the mRNA level by increased expression of miR-493 as assessed by RT-qPCR analysis. **c)** Expression of a predicted miR-22 target, KHRSP1, which showed inverse correlation with miR-22 expression in proteomic but not in transcriptomic analysis, was verified to be significantly decreased at the protein level by MicroLC-MSTRAP (MS/MS quantification; left panel) but not at the mRNA level by RT-qPCR analysis (right panel). **d)** Expression of a predicted miR-493 target, DNML1, which showed negative correlation with miR-493 expression in proteomic but not in transcriptomic analysis, was verified to be significantly decreased at the protein level by MicroLC-MSTRAP (MS/MS quantification; left panel) but not at the mRNA level by RT-qPCR analysis (right panel). Error bars in all panels represent S.D. between three technical replicates.

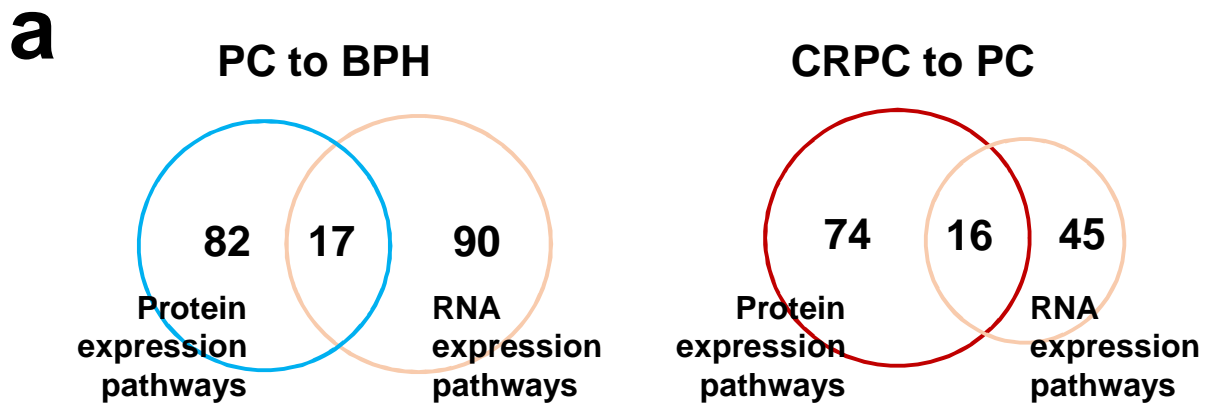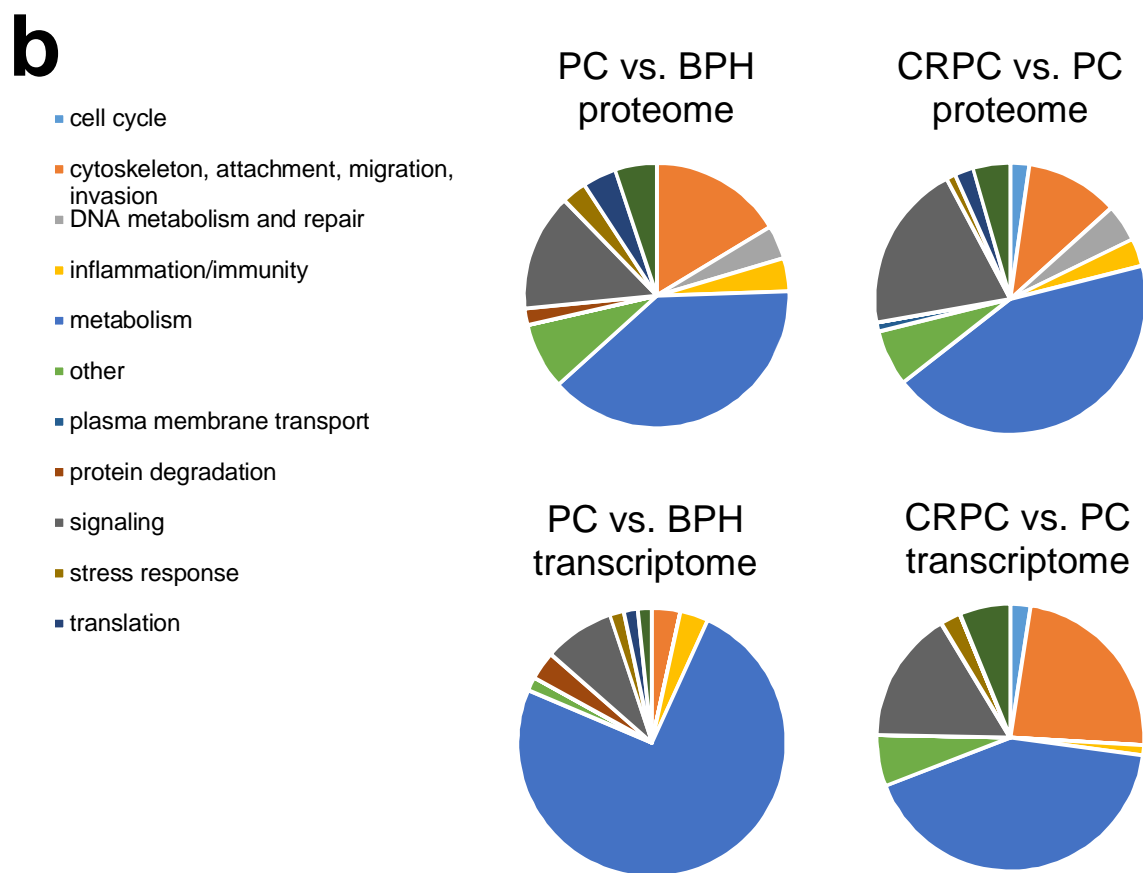

**Supplementary Figure 12. Comparison of pathways identified as differentially regulated in prostate cancer based on mRNA expression according to RNA sequencing and protein expression according to mass spectrometric analyses. A) Pie charts of groups of pathways identified as differentially regulated by proteomics and RNA sequencing in PC to BPH and CRPC to PC comparisons. B) Overlap between pathways identified as differentially regulated in proteomic and RNA sequencing data in PC to BPH and CRPC to PC comparisons.**



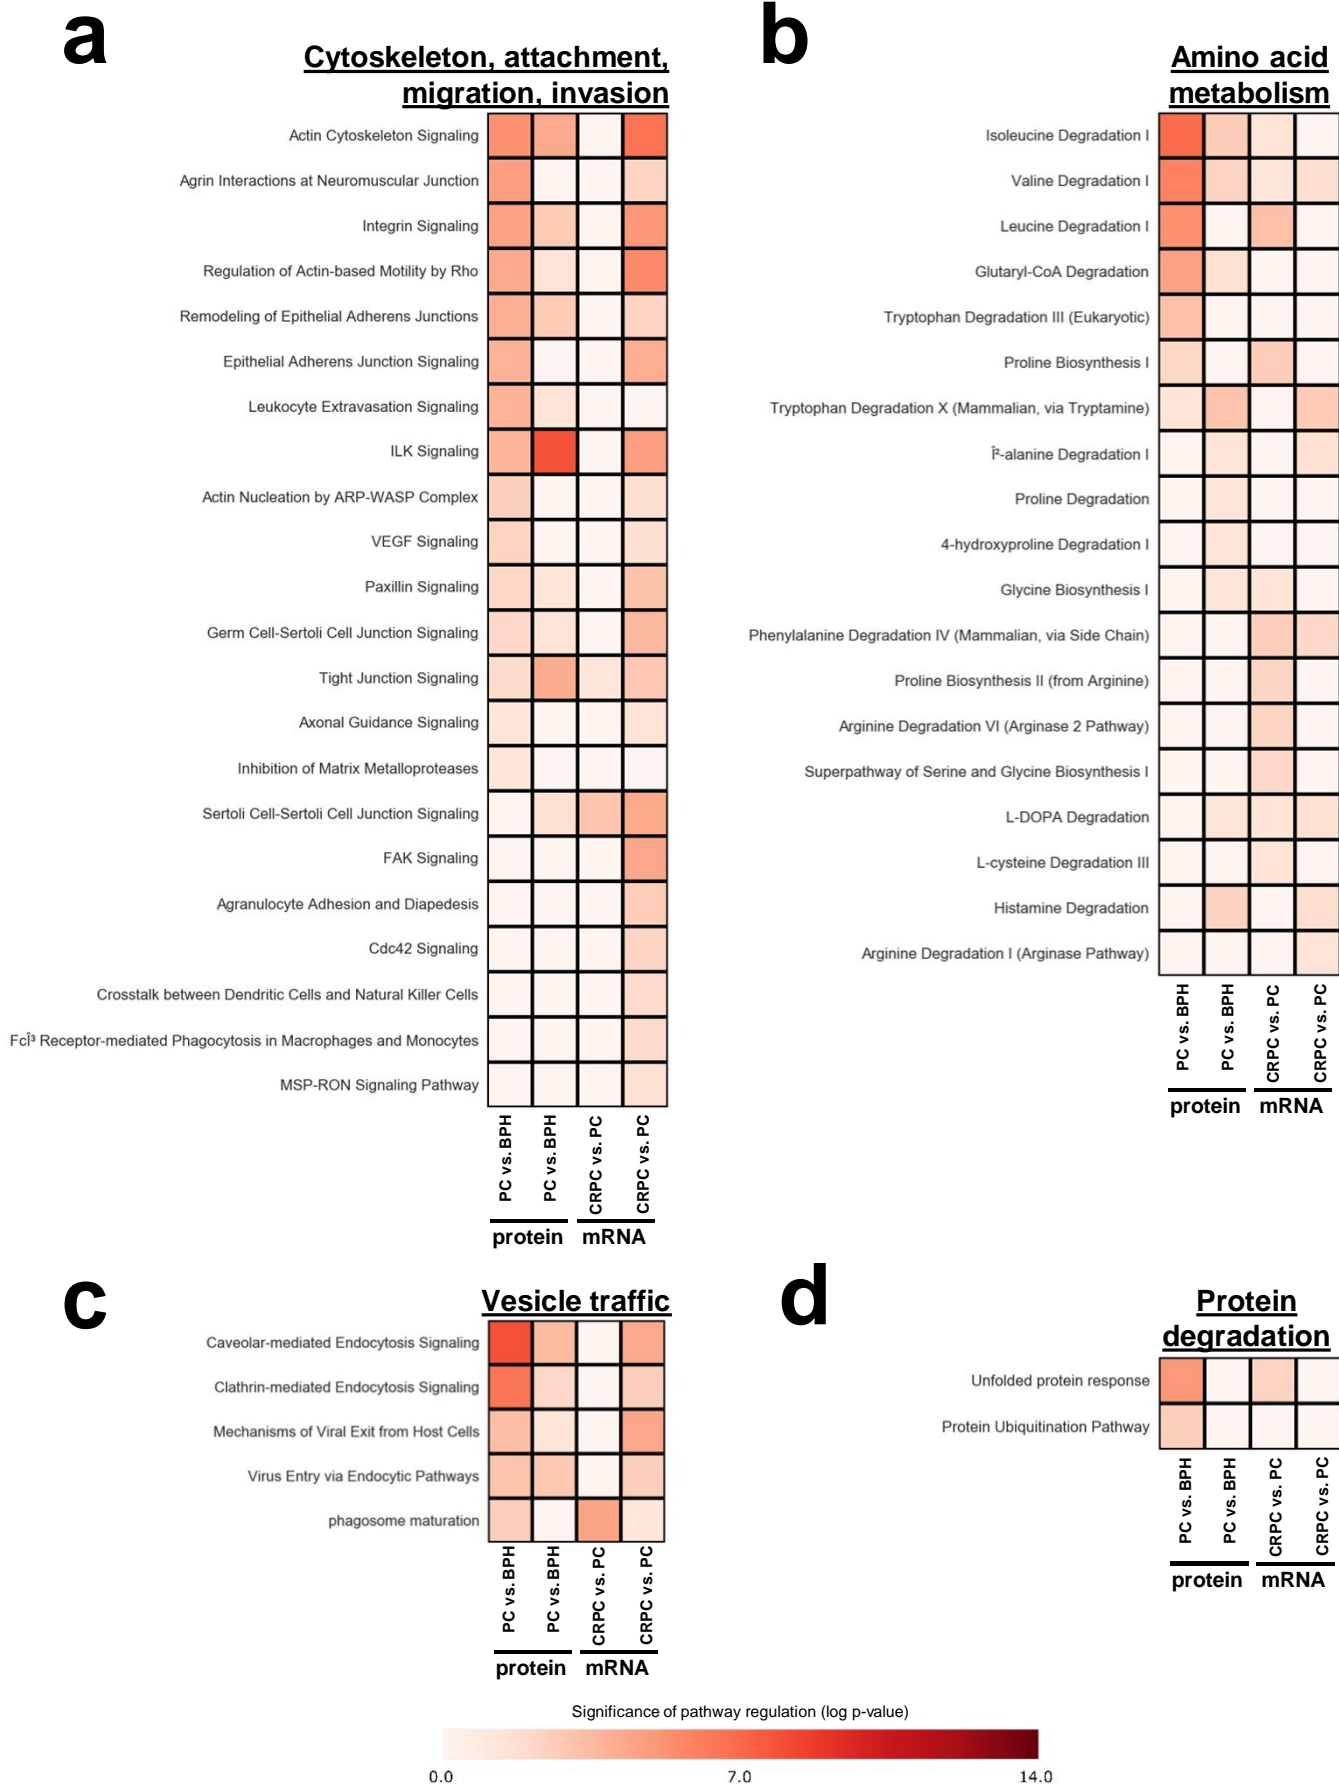

**Supplementary Figure 13. Examples of differentially expressed pathways in prostate cancer.**

Pathways identified as differentially regulated based on mRNA expression (m) according to RNA sequencing and protein expression (p) according to mass spectrometric analyses in PC vs. BPH and CRPC vs. PC comparisons. **A)** Pathways related to cytoskeleton, attachment, migration and invasion. **B)** Amino acid metabolism pathways. **C)** Vesicle traffic-related pathways. **D)** Protein degradation-related pathways. The color key below applies to all panels.

## TCA proteins considered altered in IPA pathway analysis

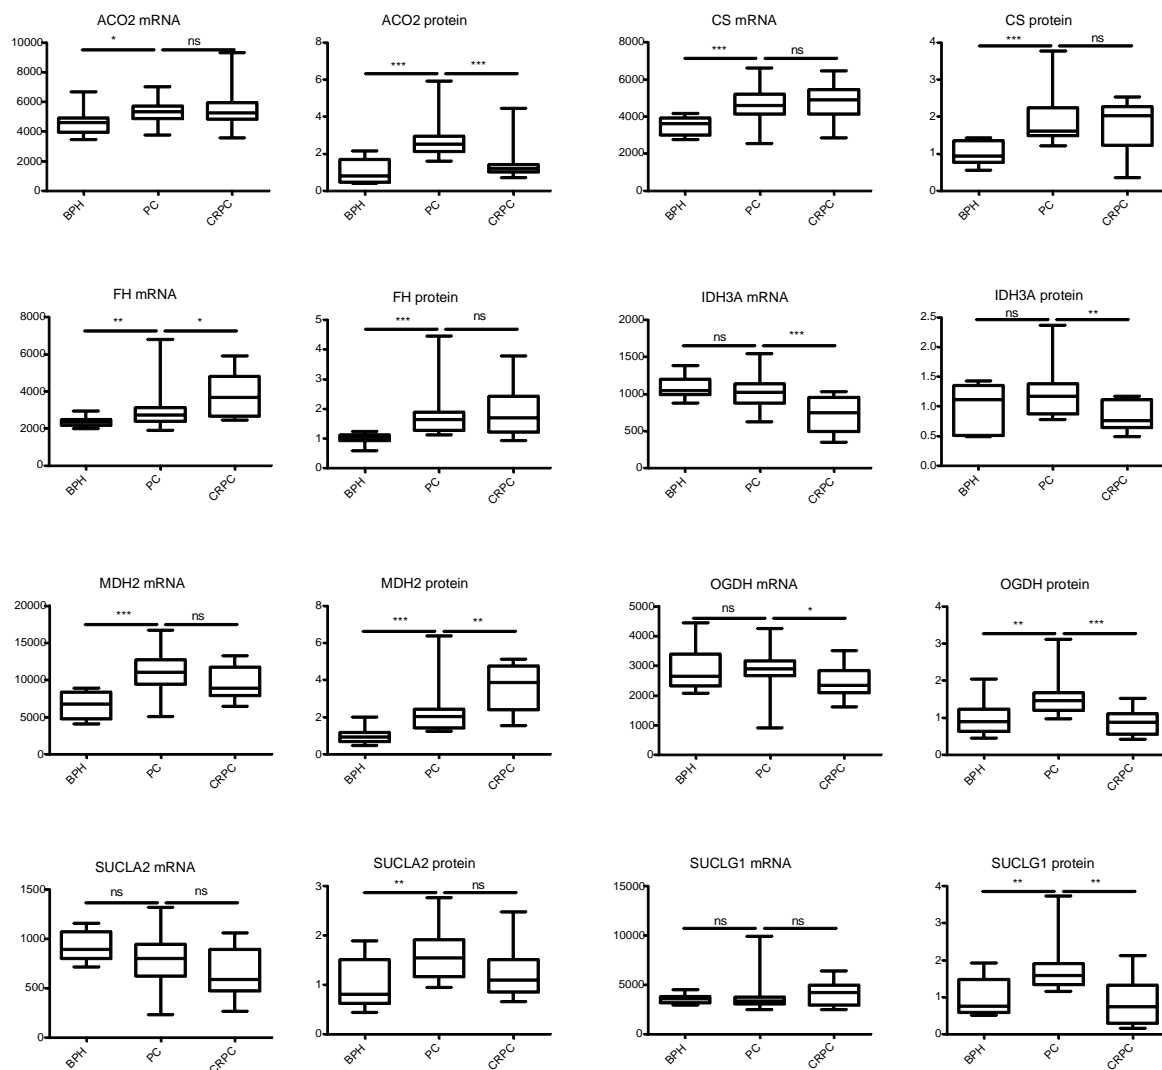

## TCA proteins considered not altered in IPA pathway analysis

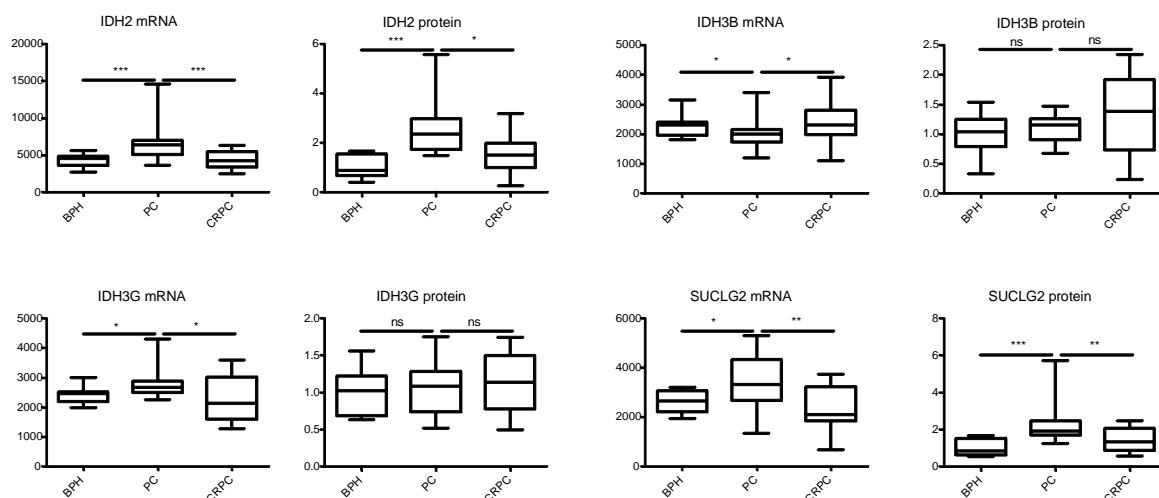

**Supplementary Figure 14. Expression of TCA cycle genes at mRNA and protein levels.** mRNA (RNAseq; left panels) and protein (mass spectrometry; right panels) levels in BPH, PC and CRPC samples. Boxplots show interquartiles with mean values, whiskers represent minimum and maximum values. Significances between groups are shown (\*p<0.05, \*\*p<0.01, \*\*\*p<0.001, ns=not significant; Mann-Whitney test).

**Protein: ACO2**  
**Peptide: SQFTITPGSEQIR**

**BPH\_718**  
**Intensity: 500**

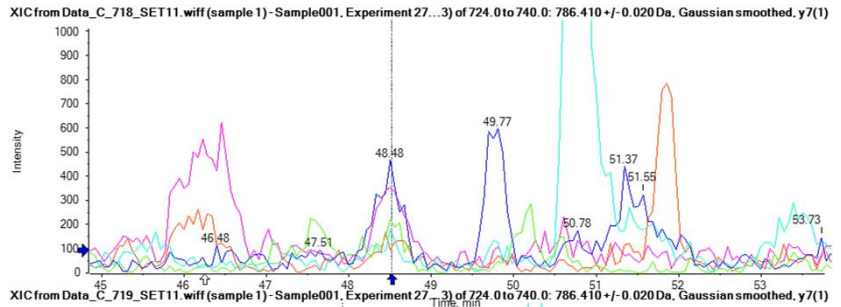

**BPH\_719**  
**Intensity: 800**

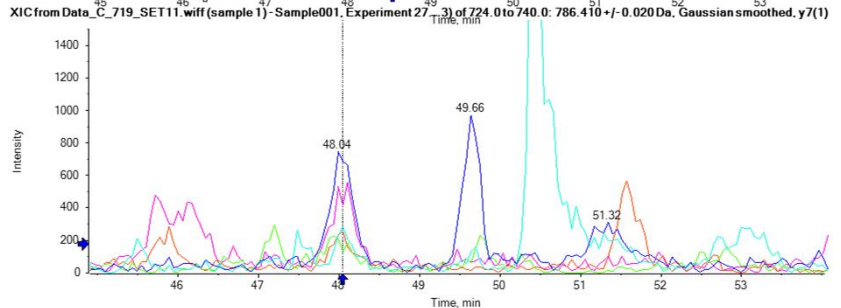

**PC\_470**  
**Intensity: 9 000**

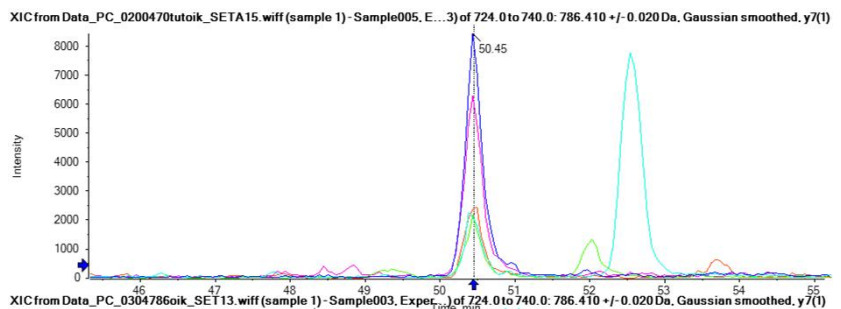

**PC\_4786**  
**Intensity: 10 000**

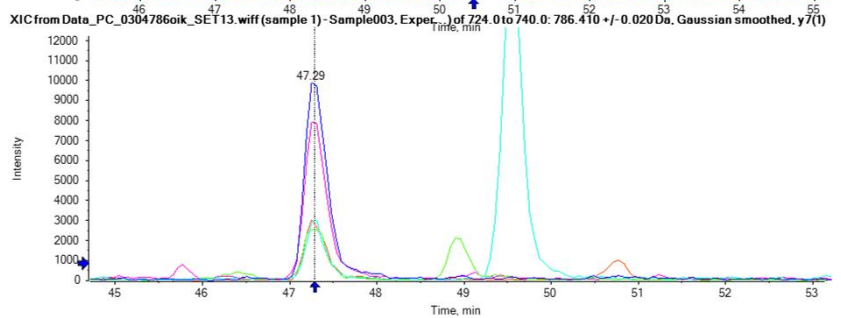

**CRPC\_530**  
**Intensity: 3700**

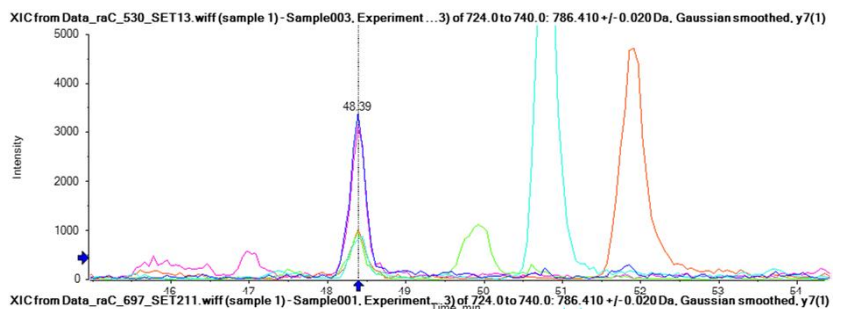

**CRPC\_679**  
**Intensity: 800**

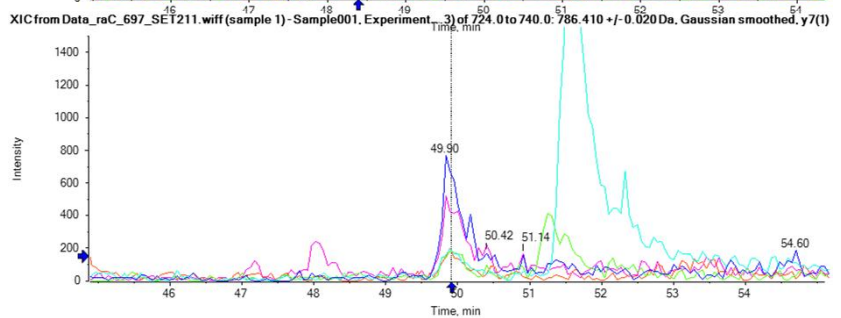

**Supplementary Figure 15. Mass spectrometry quantification of ACO2 protein in prostate cancer.** Total ion chromatograms for ACO2 peptide SQFTITPGSEQIR for selected samples used also in discovery MS and Western analyses. The fragment intensities are shown. It must be noted that the graphs are on different scales.

**Protein: MDH2**  
**Peptide: EGVVEC[CAM]SFVK**

**BPH\_718**  
**Intensity: 1 800**

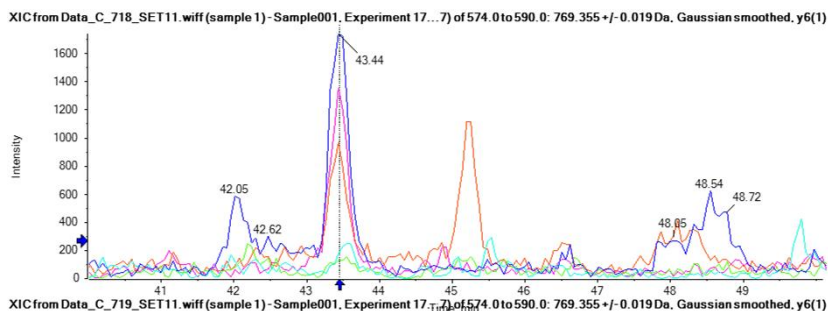

**BPH\_719**  
**Intensity: 3 700**

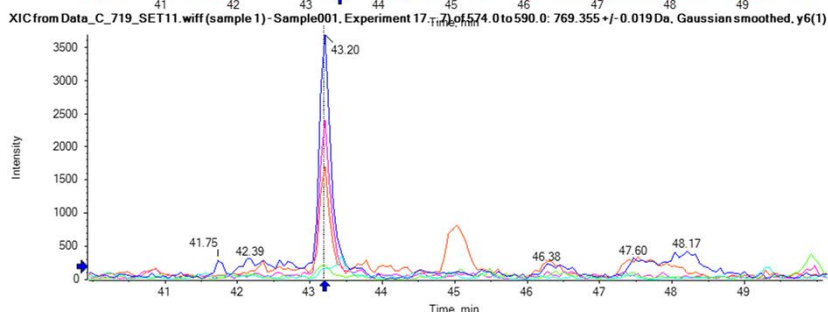

**PC\_470**  
**Intensity: 22 000**

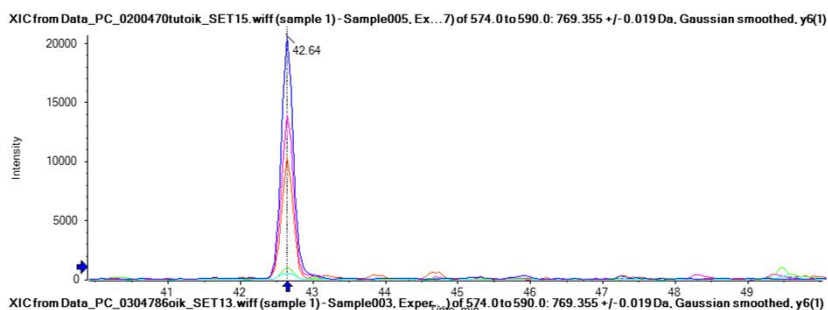

**PC\_4786**  
**Intensity: 24 500**

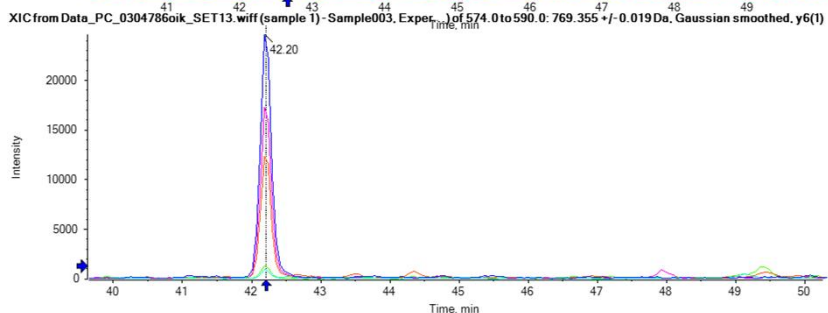

**CRPC\_530**  
**Intensity: 28 000**

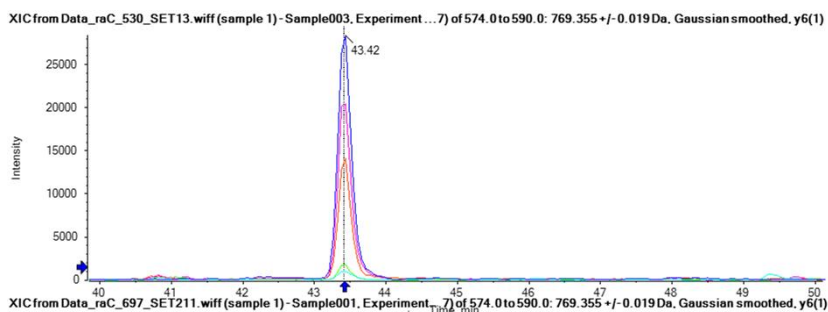

**CRPC\_697**  
**Intensity: 27 500**

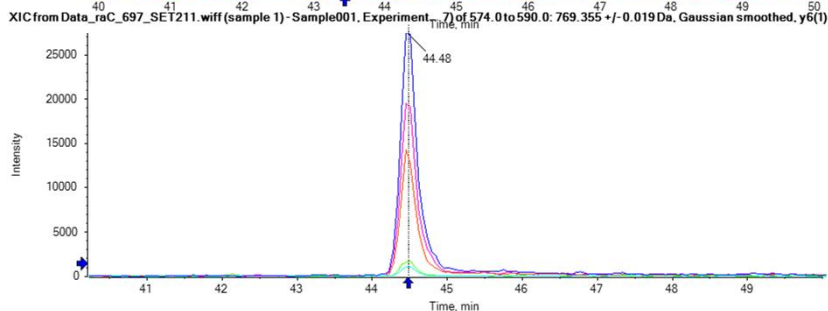

**Supplementary Figure 16. Mass spectrometry quantification of MDH2 protein in prostate cancer.** Total ion chromatograms for MDH2 peptide EGVVEC[CAM]SFVK for selected samples used also in discovery MS and Western analyses. The fragment intensities are shown. It must be noted that the graphs are on different scales.

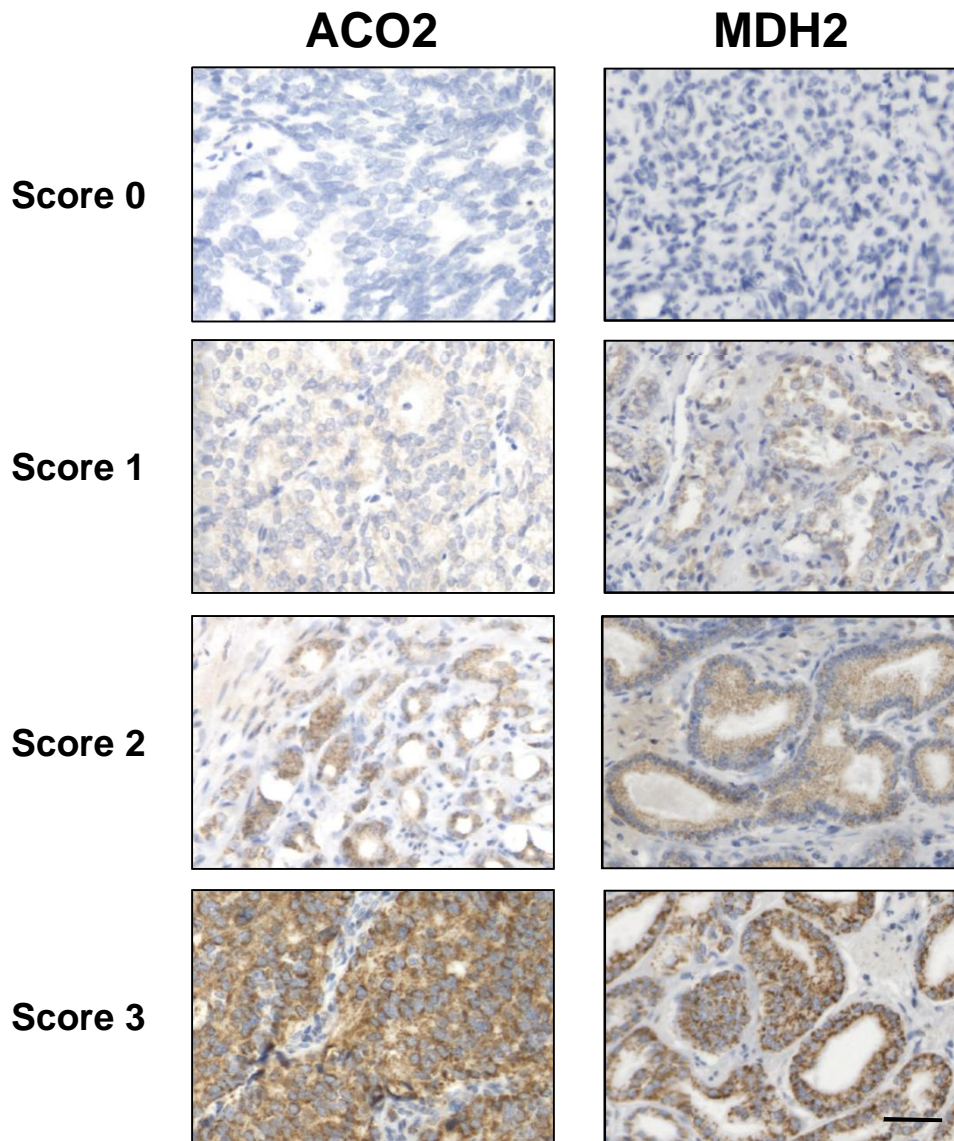

**Supplementary Figure 17. Staining intensity scores in immunohistochemical analysis of ACO2 and MDH2.** Examples of staining intensities scored as 0,1,2, and 3 are shown for ACO2 (left panel) and MDH2 (right panel). Scale bar 50  $\mu$ m.



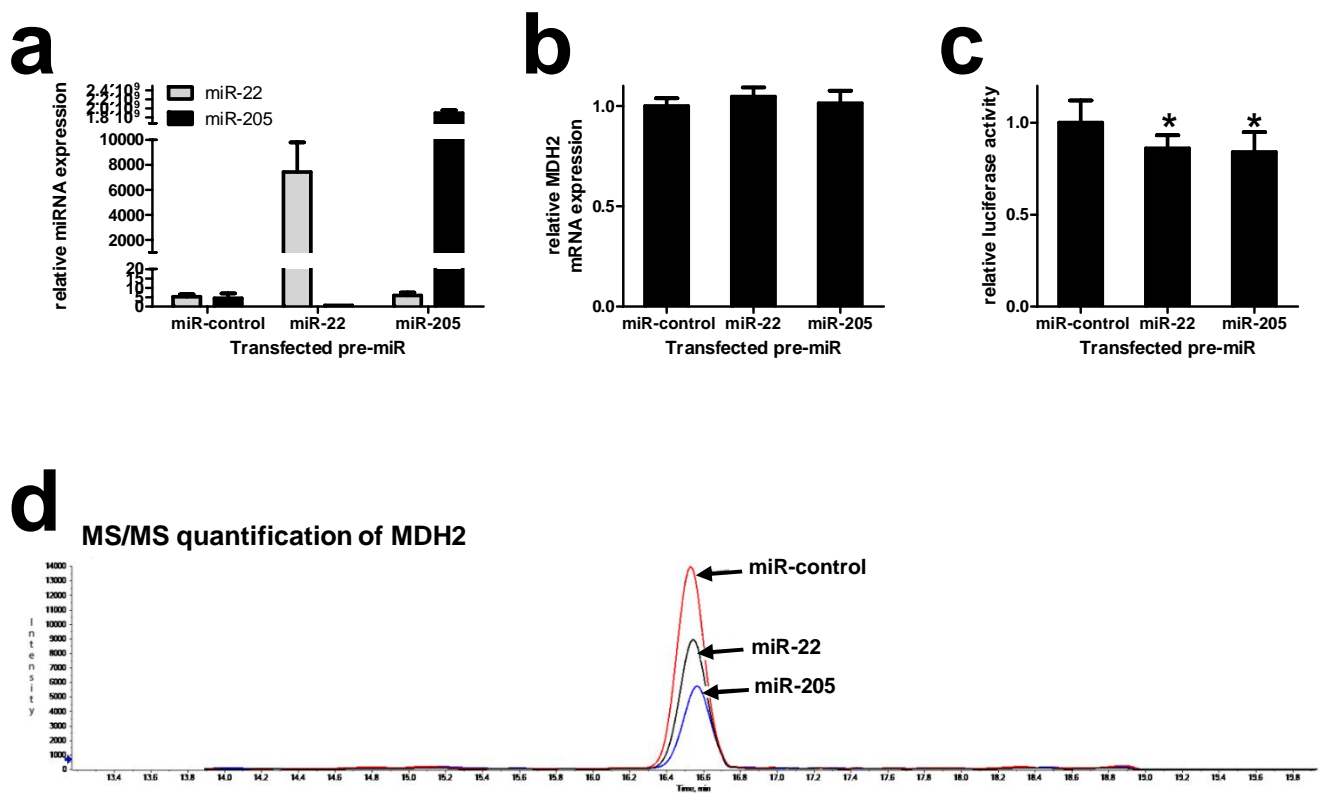

**Supplementary Figure 18. MDH2 is targeted by differentially expressed miRNAs in prostate cancer.** miR-22 and miR-205, predicted to target MDH2, have decreased expression in CRPC, and negative correlation with MDH2 based on proteomic but not transcriptomic analyses. The ability of these miRNAs to target MDH2 was verified by assessing mRNA and protein levels of MDH2 in PC-3 cells transfected with pre-miRNA constructs. **a)** Successful transfections and expressions of the transfected miRNAs were verified by TaqMan microRNA RT-qPCR assays. Error bars represent S.D. between three technical replicates. **b)** Expression of MDH2 mRNA levels remain unaltered by increased expression of miR-22 and miR-205 as assessed by RT-qPCR analysis. Error bars represent S.D. between three technical replicates. **c)** Increased expression of miR-22 and miR-205 decrease MDH2-3'UTR luciferase reporter activity in pre-miR transfected cells in a statistically significant ( $*p < 0.05$ ; unpaired t-test compared to miR-control) manner. Error bars represent S.E.M. between four technical replicates. **d)** Expression of MDH2 was verified to be significantly decreased by increased expression of miR-22 and miR-205 at the protein level as assessed with MicroLC-MSTRAP MS/MS quantification.

**a**

**ACO2**

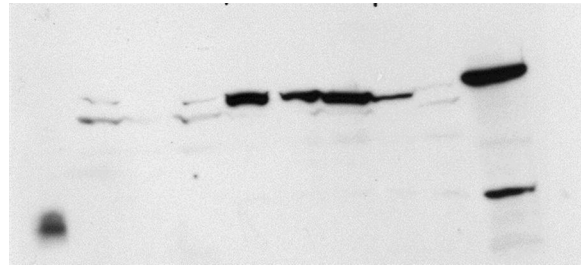

**MDH2**

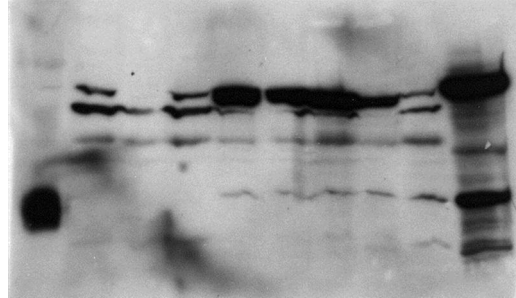

**Pan-actin**

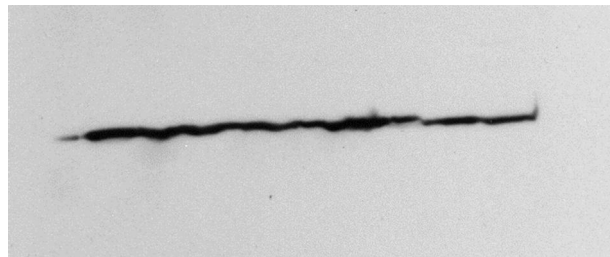

**b**

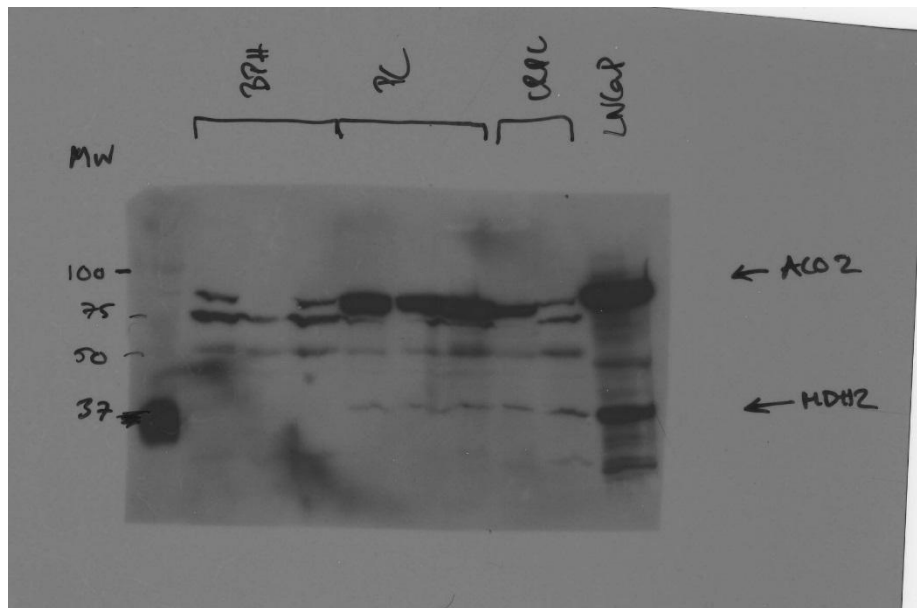

**Supplementary Figure 19. Original scans and molecular weight markers for western blots shown in Figure 5. a) Original scans for western blots shown in Figure 5C. b) A scan of ACO2 and MDH2 western blot showing molecular weight markers of 37-100kDa. The sizes of the proteins are approximately 85kDa and 35.5kDa for ACO2 and MDH2, respectively. MDH2 is known to run slightly above the expected size.**

Supplementary Table 1. Description of primary PC samples used in the study.

| Sample ID | Age at diagnosis | PSA at diagnosis | T class | N class | M class | Gleason score | Progression | Progression PSA |
|-----------|------------------|------------------|---------|---------|---------|---------------|-------------|-----------------|
| PC_5934   | 67,4             | 9,6              | T1c     | NX      | M0      | 6             | No          |                 |
| PC_8131   | 61,8             | 6,7              | T1c     | NX      | MX      | 5             | No          |                 |
| PC_12517  | 65,5             | 5,9              | T1c     | NX      | MX      | 7             | No          |                 |
| PC_15420  | 60,3             | 12,6             | T1c     | NX      | M0      | 7             | Yes         | 0,8             |
| PC_15760  | 64,7             | 14               | T2      | NX      | M0      | 7             | Yes         | 0,8             |
| PC_18307  | 47,4             | 5,1              | T2      | NX      | MX      | 7             | No          |                 |
| PC_9324   | 67,3             | 10,3             | T2      | NX      | M0      | 6             | No          |                 |
| PC_14670  | 71,8             | 7,5              | T2      | NX      | MX      | 8             | Yes         | 2,1             |
| PC_17447  | 65,8             | 13,2             | T2      | NX      | M0      | 9             | Yes         | 1,7             |
| PC_470    | 70,9             | 17,6             | T2a     | NX      | M0      | 8             | Yes         |                 |
| PC_10286  | 67,8             | 5,4              | T1c     | NX      | M0      | 6             | No          |                 |
| PC_15194  | 62,7             | 9,5              | T2      | NX      | MX      | 7             | Yes         | 1               |
| PC_20873  | 49,6             | 8,3              | T1c     | NX      | MX      | 7             | No          |                 |
| PC_4786   | 55,4             | 10,2             | T1c     | NX      | M0      | 7             | Yes         | 1,9             |
| PC_4906   | 58,3             | 4                | T2      | NX      | MX      | 6             | No          |                 |
| PC_4980   | 59,7             | 3,5              | T1c     | NX      | MX      | 6             | No          |                 |
| PC_17163  | 56,8             | 19,8             | T2      | NX      | M0      | 7             | Yes         | 1,1             |

Supplementary Table 2. Description of CRPC samples used in the study.

| <b>Sample ID</b> | <b>Sample type</b> | <b>Hormonal treatment</b> |
|------------------|--------------------|---------------------------|
| CRPC_278         | CRPC               | orchiectomy               |
| CRPC_305         | CRPC               | bicalutamide+orchiectomy  |
| CRPC_348         | CRPC               | orchiectomy               |
| CRPC_435         | CRPC               | LHRH                      |
| CRPC_489         | CRPC               | LHRH                      |
| CRPC_530         | CRPC               | LHRH+bicalutamide         |
| CRPC_531         | CRPC               | orchiectomy               |
| CRPC_539         | CRPC               | LHRH analog               |
| CRPC_541         | CRPC               | estrogen                  |
| CRPC_543         | CRPC               | orchiectomy               |
| CRPC_697         | CRPC               | orchiectomy               |





Supplementary Table 4. Validated exonic point mutations in the samples of the study.

## A. Germline mutations

|                  | impact_score_mr | impact_score_pr | CHROM | POSITION  | REF | ALT | EXONIC_FUNCTION     | samples                 |
|------------------|-----------------|-----------------|-------|-----------|-----|-----|---------------------|-------------------------|
| ETFDH:159620229  | -4,273888816    | -0,54273593     | chr4  | 159620229 | GG  | -   | frameshift deletion | ['PC_10286']            |
| COPE:19016431    | -4,004980013    | -0,037039381    | chr19 | 19016431  | T   | C   | nonsynonymous SNV   | ['PC_5934']             |
| IARS2:220307849  | -2,421725442    | -1,190784815    | chr1  | 220307849 | A   | C   | nonsynonymous SNV   | ['PC_8131']             |
| RGN:46951576     | -2,305673119    | -1,681312431    | chrX  | 46951576  | G   | A   | nonsynonymous SNV   | ['CRPC_278']            |
| MTHFD1L:1513582  | -1,954600174    | -2,822050963    | chr6  | 151358205 | C   | G   | nonsynonymous SNV   | ['PC_15420']            |
| ASNS:97484750    | -1,871877712    | -1,630845781    | chr7  | 97484750  | T   | C   | nonsynonymous SNV   | ['PC_10286']            |
| RPTOR:78935195   | -1,829344006    | 0,803092254     | chr17 | 78935195  | C   | T   | nonsynonymous SNV   | ['PC_15760']            |
| MPP6:24720066    | -1,803920348    | -1,788661812    | chr7  | 24720066  | C   | G   | nonsynonymous SNV   | ['PC_15760']            |
| ALDH9A1:1656486  | -1,741794931    | -6,414159836    | chr1  | 165648699 | T   | C   | nonsynonymous SNV   | ['PC_20873']            |
| EIF5:103804756   | -1,63902985     | 0,38031895      | chr14 | 103804756 | A   | G   | nonsynonymous SNV   | ['PC_18307']            |
| CPE:166388880    | -1,574507982    | -0,403235961    | chr4  | 166388880 | C   | T   | nonsynonymous SNV   | ['PC_15194']            |
| PEPD:33892648    | -1,451834049    | 2,152853751     | chr19 | 33892648  | C   | T   | nonsynonymous SNV   | ['PC_12517']            |
| RANBP2:10938179  | -1,425637825    | -0,02828696     | chr2  | 109381791 | T   | C   | nonsynonymous SNV   | ['PC_470']              |
| CHAF1B:37787599  | -1,250748131    | -0,547676391    | chr21 | 37787599  | A   | G   | nonsynonymous SNV   | ['PC_5934']             |
| DPM3:155112667   | -1,215943482    | -5,065267165    | chr1  | 155112667 | G   | A   | nonsynonymous SNV   | ['PC_4980']             |
| LMNB1:126145930  | -0,850252728    | -3,593321509    | chr5  | 126145930 | G   | A   | nonsynonymous SNV   | ['PC_15194']            |
| SPAG9:49074053   | -0,824631259    | -1,18179288     | chr17 | 49074053  | G   | C   | nonsynonymous SNV   | ['PC_18307']            |
| CTSH:79214537    | -0,691312942    | -2,412403692    | chr15 | 79214537  | T   | G   | nonsynonymous SNV   | ['PC_4980']             |
| UBQLN2:56591304  | -0,663752156    | 0,540432242     | chrX  | 56591304  | G   | A   | nonsynonymous SNV   | ['PC_470']              |
| UBQLN2:56591220  | -0,663752156    | 0,540432242     | chrX  | 56591220  | C   | T   | nonsynonymous SNV   | ['PC_470']              |
| VPS4B:61066514   | -0,564056986    | -2,280248035    | chr18 | 61066514  | G   | A   | nonsynonymous SNV   | ['PC_12517']            |
| HSP90B1:1043411  | -0,535409613    | 0,17095656      | chr12 | 104341190 | A   | T   | nonsynonymous SNV   | ['PC_20873', 'PC_8131'] |
| CTSZ:57581475    | -0,484079558    | -1,801491478    | chr20 | 57581475  | T   | C   | nonsynonymous SNV   | ['PC_12517']            |
| OSGEP:20915587   | -0,475402189    | 0,098074718     | chr14 | 20915587  | G   | A   | nonsynonymous SNV   | ['PC_5934']             |
| ABCD1:153002679  | -0,346700329    | -1,42792387     | chrX  | 153002679 | G   | A   | nonsynonymous SNV   | ['PC_14670']            |
| RPL14:40499417   | -0,335296223    | -0,98264535     | chr3  | 40499417  | T   | C   | nonsynonymous SNV   | ['PC_20873']            |
| TARS:33461278    | -0,284917868    | -1,704888314    | chr5  | 33461278  | A   | G   | nonsynonymous SNV   | ['PC_12517']            |
| SORDL:45968461   | -0,13960676     | -1,950509575    | chr15 | 45968461  | G   | T   | nonsynonymous SNV   | ['PC_12517']            |
| TMEM70:7489365   | -0,116885593    | -2,822330142    | chr8  | 74893650  | AC  | -   | frameshift deletion | ['PC_20873']            |
| COG1:71189276    | -0,074543771    | 1,237121775     | chr17 | 71189276  | A   | G   | nonsynonymous SNV   | ['PC_4906']             |
| UBR4:19484329    | 0,019359305     | -0,938361369    | chr1  | 19484329  | C   | T   | nonsynonymous SNV   | ['CRPC_435']            |
| NUBP2:1837966    | 0,042168735     | 0,396842622     | chr16 | 1837966   | C   | T   | nonsynonymous SNV   | ['PC_4906']             |
| TNS1:218678425   | 0,051673179     | 1,123283793     | chr2  | 218678425 | A   | T   | nonsynonymous SNV   | ['PC_17163']            |
| ME1:83963448     | 0,172284302     | 1,406340813     | chr6  | 83963448  | C   | A   | nonsynonymous SNV   | ['PC_20873']            |
| CPT2:53662764    | 0,238348996     | -1,306425787    | chr1  | 53662764  | C   | A   | nonsynonymous SNV   | ['PC_5934']             |
| PLEC:144996110   | 0,270304018     | -3,222110154    | chr8  | 144996110 | G   | A   | nonsynonymous SNV   | ['PC_12517']            |
| PRRC2A:31599160  | 0,293474963     | 1,72655447      | chr6  | 31599160  | C   | T   | nonsynonymous SNV   | ['PC_5934']             |
| GGT1:25011062    | 0,353347597     | -1,210108359    | chr22 | 25011062  | C   | G   | nonsynonymous SNV   | ['PC_12517']            |
| PODXL2:12738739  | 0,367683536     | -0,693133729    | chr3  | 127387398 | G   | A   | nonsynonymous SNV   | ['PC_470']              |
| PRPF40A:1535191  | 0,429509473     | -2,145094997    | chr2  | 153519194 | T   | C   | nonsynonymous SNV   | ['PC_17163']            |
| C16orf58:3150494 | 0,501838512     | -0,304870968    | chr16 | 31504947  | T   | C   | nonsynonymous SNV   | ['PC_14670']            |
| AP2A1:50304686   | 0,536094118     | 0,447112847     | chr19 | 50304686  | T   | A   | nonsynonymous SNV   | ['PC_10286']            |
| SPR:73114562     | 0,576270434     | -0,663548577    | chr2  | 73114562  | A   | C   | nonsynonymous SNV   | ['PC_10286']            |
| DPT:168683499    | 0,679950556     | -0,011376111    | chr1  | 168683499 | A   | G   | nonsynonymous SNV   | ['PC_4980']             |
| POLR2A:7406475   | 0,796541938     | 0,574051297     | chr17 | 7406475   | G   | A   | nonsynonymous SNV   | ['PC_10286']            |
| FLNA:153581670   | 0,825557059     | 3,535726491     | chrX  | 153581670 | G   | A   | nonsynonymous SNV   | ['PC_15420']            |
| FLNA:153581200   | 0,825557059     | 3,535726491     | chrX  | 153581200 | A   | T   | nonsynonymous SNV   | ['PC_15420']            |
| KRT17:39775857   | 0,905159486     | -4,85332262     | chr17 | 39775857  | T   | C   | nonsynonymous SNV   | ['PC_4786']             |
| DIAPH1:14095155  | 0,912825406     | 2,375665048     | chr5  | 140951550 | A   | C   | nonsynonymous SNV   | ['CRPC_489']            |
| PLEC:145004655   | 0,99934132      | 1,682492752     | chr8  | 145004655 | G   | A   | nonsynonymous SNV   | ['PC_17163']            |
| ACE:61574343     | 1,034011502     | -0,18074709     | chr17 | 61574343  | T   | G   | nonsynonymous SNV   | ['PC_12517']            |
| COL6A2:47552167  | 1,149600811     | -0,431916679    | chr21 | 47552167  | G   | A   | nonsynonymous SNV   | ['PC_20873']            |
| PABPC1:10171896  | 1,247821824     | -0,451516425    | chr8  | 101718964 | C   | T   | nonsynonymous SNV   | ['PC_20873']            |
| MYH9:36722663    | 1,268606229     | 4,509180978     | chr22 | 36722663  | C   | T   | nonsynonymous SNV   | ['PC_20873']            |
| CA3:86351166     | 1,305788345     | 2,487943429     | chr8  | 86351166  | C   | T   | nonsynonymous SNV   | ['PC_8131']             |
| PALM:746714      | 1,343015829     | -1,369622987    | chr19 | 746714    | C   | T   | nonsynonymous SNV   | ['PC_15194']            |
| FLII:18160308    | 1,370465668     | -2,472867819    | chr17 | 18160308  | T   | G   | nonsynonymous SNV   | ['PC_4906']             |
| UBE2O:74392608   | 1,513313035     | -2,786718769    | chr17 | 74392608  | T   | C   | nonsynonymous SNV   | ['PC_4786']             |
| SPINT2:38780888  | 1,669515196     | -0,863638812    | chr19 | 38780888  | G   | A   | nonsynonymous SNV   | ['PC_15420']            |
| GOLGA2:13102497  | 1,842791732     | -0,960268864    | chr9  | 131024970 | C   | G   | nonsynonymous SNV   | ['PC_8131']             |
| UBAP2L:15422177  | 2,109949591     | 0,651944432     | chr1  | 154221776 | G   | A   | nonsynonymous SNV   | ['PC_15194']            |
| ELN:73477965     | 3,527676502     | 2,99193953      | chr7  | 73477965  | G   | A   | nonsynonymous SNV   | ['CRPC_697']            |

Supplementary Table 4. Validated exonic point mutations in the samples of the study.

## B. Somatic mutations

|                  | impact_score_mr | impact_score_pr | CHROM | POSITION  | REF | ALT | EXONIC_FUNCTION   | samples      |
|------------------|-----------------|-----------------|-------|-----------|-----|-----|-------------------|--------------|
| FOXA1:38061231   | -18,71217922    | -1,300208368    | chr14 | 38061231  | A   | T   | nonsynonymous SNV | ['PC_10286'] |
| GIGYF2:233651920 | -3,198048213    | -0,867832628    | chr2  | 233651920 | G   | A   | nonsynonymous SNV | ['PC_15194'] |
| FOXA1:38061862   | -3,130111294    | 0,027570643     | chr14 | 38061862  | A   | T   | nonsynonymous SNV | ['CRPC_531'] |
| CHD4:6700867     | -2,995076236    | 2,772231077     | chr12 | 6700867   | A   | G   | nonsynonymous SNV | ['CRPC_489'] |
| CTNNB1:41266097  | -1,919718291    | 1,376822462     | chr3  | 41266097  | G   | T   | nonsynonymous SNV | ['CRPC_278'] |
| ACO2:41923373    | -1,597392883    | -0,882920942    | chr22 | 41923373  | C   | T   | nonsynonymous SNV | ['PC_15420'] |
| DNAJC8:28527842  | -0,736821923    | 2,011982114     | chr1  | 28527842  | G   | A   | stopgain SNV      | ['PC_5934']  |
| RPL8:146015286   | -0,274389122    | 0,831359775     | chr8  | 146015286 | C   | T   | nonsynonymous SNV | ['PC_8131']  |
| OSBP1:76769065   | -0,062942687    | 1,56070343      | chr12 | 76769065  | T   | A   | nonsynonymous SNV | ['PC_4786']  |
| BDH1:197239092   | -0,044832453    | -1,289222392    | chr3  | 197239092 | C   | A   | nonsynonymous SNV | ['CRPC_435'] |
| SSRP1:57099223   | 0,088695461     | 0,512964912     | chr11 | 57099223  | C   | T   | nonsynonymous SNV | ['PC_4786']  |
| SELENBP1:151339  | 0,098027497     | -0,357692181    | chr1  | 151339341 | T   | C   | nonsynonymous SNV | ['PC_17163'] |
| KIDINS220:889032 | 0,799550215     | 0,123625761     | chr2  | 8890321   | G   | T   | nonsynonymous SNV | ['CRPC_539'] |
| HAT1:172848181   | 1,061823611     | -0,61110626     | chr2  | 172848181 | G   | A   | nonsynonymous SNV | ['CRPC_435'] |
| HNRNPR:23645070  | 1,707664207     | 1,300541598     | chr1  | 23645070  | C   | T   | nonsynonymous SNV | ['PC_470']   |
| AIM1:106968097   | 1,878314166     | 0,811693291     | chr6  | 106968097 | C   | T   | nonsynonymous SNV | ['PC_15194'] |
| SRP68:74036543   | 2,120077794     | -0,730976967    | chr17 | 74036543  | G   | C   | nonsynonymous SNV | ['PC_470']   |
| EIF3I:32692064   | 2,168386633     | 0,231372746     | chr1  | 32692064  | G   | C   | nonsynonymous SNV | ['CRPC_539'] |
| COX5B:98262619   | 3,507438371     | 0,529914215     | chr2  | 98262619  | G   | A   | nonsynonymous SNV | ['CRPC_539'] |
| TARDBP:11082217  | 3,665980066     | -2,820575209    | chr1  | 11082217  | A   | G   | nonsynonymous SNV | ['CRPC_489'] |

Supplementary Table 5. Correlation of protein expression with mutation load.

Point mutations  
(correlation >0.5 or <-0.5)

| gene    | correlation |
|---------|-------------|
| PLIN4   | -0,5974     |
| PAIP2   | -0,55501    |
| NOL3    | -0,5276     |
| ABCF2   | 0,514033    |
| DAP3    | 0,55614     |
| C8orf82 | 0,560096    |
| UQCR10  | 0,569421    |
| DARS2   | 0,575638    |
| PHB     | 0,582986    |
| CAD     | 0,594007    |
| PRDX3   | 0,645156    |

Copy number alterations  
(correlation >0.75 or <=-0.75)

| gene    | correlation |
|---------|-------------|
| COPG1   | -0,88538    |
| NANS    | -0,86462    |
| IQGAP2  | -0,82016    |
| TAGLN   | -0,79283    |
| GMDS    | -0,77372    |
| STXBP3  | -0,77273    |
| UCHL3   | -0,76581    |
| SEC14L2 | -0,76383    |
| ANXA5   | -0,75958    |
| MAN2B2  | -0,75       |
| PFDN6   | 0,750988    |
| TOMM40  | 0,753953    |
| SHMT2   | 0,753953    |
| SNRPF   | 0,768775    |
| LASP1   | 0,768775    |
| VDAC2   | 0,774704    |
| VDAC1   | 0,796443    |

Rearrangements  
(correlation >0.7 or <-0.7)

| gene    | correlation |
|---------|-------------|
| TLN2    | -0,79075    |
| TLN1    | -0,75628    |
| EIF3D   | -0,74013    |
| PSMD12  | -0,72748    |
| MDH1    | -0,72704    |
| PFKP    | -0,72093    |
| EHD2    | -0,70086    |
| ATP5D   | 0,702165    |
| RAN     | 0,704783    |
| TIMM8B  | 0,715693    |
| TMSB4X  | 0,72704     |
| RPL27A  | 0,729222    |
| C7orf55 | 0,729658    |
| CARKD   | 0,741441    |
| COX5B   | 0,747114    |
| SPARC   | 0,767188    |
| SLTM    | 0,767188    |

Supplementary Table 6. miRNAs and their negatively correlating (&lt;-0.50) targets as identified based on differential mRNA expression

## miRNA correlating mRNA (targets correlating also at the protein level marked in red colour)

*differentially expressed miRNAs in italics*

miRNAs identified in several analyses highlighted with colour.

## correlated in PC

|                              |                                                                                                      |
|------------------------------|------------------------------------------------------------------------------------------------------|
| <i>hsa-miR-1193</i>          | ['GINS4', 'SYNPO']                                                                                   |
| <i>hsa-miR-181c-5p</i>       | ['NDRG2', 'ACTC1', 'HMGB2']                                                                          |
| <b><i>hsa-miR-23a-3p</i></b> | ['DDX39B', 'MRGPRF', 'PAGE4']                                                                        |
| <i>hsa-miR-3150a-5p</i>      | ['LPCAT1']                                                                                           |
| <i>hsa-miR-3661</i>          | ['AR', 'PC', 'NFIX']                                                                                 |
| <i>hsa-miR-382-5p</i>        | ['KIAA1210', 'PARVA', 'MAN2B2']                                                                      |
| <i>hsa-miR-3914</i>          | ['LMNB1', 'AR', 'NFIX']                                                                              |
| <i>hsa-miR-4664-3p</i>       | ['SEC14L2']                                                                                          |
| <i>hsa-miR-491-3p</i>        | ['XPNPEP3', 'GRB10']                                                                                 |
| <i>hsa-miR-615-5p</i>        | ['CSR1', 'PPP1R12B', 'GPX3', 'PGM5', 'DES', 'LSAMP', 'GNAO1', 'ARRB1']                               |
| <i>hsa-miR-92a-2-5p</i>      | ['TMEM35', 'LSAMP', 'CNN1', 'SLC25A4', 'GLIPR2', 'ACTC1', 'LDB3', 'PEBP4', 'GNAO1', 'MYLK', 'ARRB1'] |

## correlated in CRPC

|                              |                                                                                                                                                              |
|------------------------------|--------------------------------------------------------------------------------------------------------------------------------------------------------------|
| <i>hsa-miR-106b-5p</i>       | ['FXD3', 'CFL2', 'PPP1R12B', 'PTGIS', 'PDLIM4', 'PARVA', 'MYADM', 'SYNM', 'PGM5', 'TGFB11', 'PTRF', 'TNKS1BP1', 'PRELP', 'CNN1', 'MYO1C', 'ALOX15B', 'TNS1'] |
| <i>hsa-miR-125a-3p</i>       | ['ABAT', 'HM13', 'EIF5', 'REEP6', 'ARRB1']                                                                                                                   |
| <i>hsa-miR-182-5p</i>        | ['CACNA2D1', 'SYNPO', 'SH3BGR', 'MYO1C', 'LDB3', 'LMOD1', 'TMPRSS2', 'ALDH1A2', 'SLC4A1']                                                                    |
| <i>hsa-miR-194-3p</i>        | ['HM13', 'COMT', 'LPCAT1', 'SMC4']                                                                                                                           |
| <i>hsa-miR-205-5p</i>        | ['GTPBP10', 'XPNPEP3', 'AR', 'PNN']                                                                                                                          |
| <b><i>hsa-miR-23a-3p</i></b> | ['OGT', 'DDX39B', 'ACADSB', 'XPNPEP3', 'AR', 'PNN', 'NFIX']                                                                                                  |
| <i>hsa-miR-3065-3p</i>       | ['CPE', 'HEXA', 'LMOD1', 'TNS1', 'PCCA']                                                                                                                     |
| <i>hsa-miR-30c-1-3p</i>      | ['ABAT', 'HSPB6', 'MYADM', 'MYH11', 'SYNPO', 'PLIN4', 'TNS1', 'ASNA1', 'GNAO1']                                                                              |
| <i>hsa-miR-3162-3p</i>       | ['CSR1', 'TMEM35', 'PTGIS', 'SLC25A35', 'PRELP', 'PDLIM7', 'SORBS1', 'GNAO1']                                                                                |
| <i>hsa-miR-3619-5p</i>       | ['SLC9A3R2', 'PPP1R12B', 'GMPR', 'C16orf58', 'VAMP2', 'ACPP', 'GLIPR2', 'BAIAP2', 'MYO1C', 'LDB3', 'PEBP4', 'ARRB1']                                         |
| <i>hsa-miR-3929</i>          | ['SLC9A3R2', 'OGT', 'ACADSB', 'MTDH', 'XPNPEP3', 'AR', 'BAIAP2', 'NFIX']                                                                                     |
| <i>hsa-miR-4645-5p</i>       | ['HM13', 'ACADSB', 'XPNPEP3', 'PDCD11', 'SSBP1']                                                                                                             |
| <i>hsa-miR-4649-3p</i>       | ['FANCD2', 'HM13', 'XPNPEP3', 'GNMT', 'SSBP1']                                                                                                               |
| <i>hsa-miR-4748</i>          | ['SLC9A3R2', 'PPP1R12B', 'GMPR', 'C16orf58', 'VAMP2', 'GLIPR2', 'LDB3', 'PLIN4', 'PEBP4']                                                                    |
| <i>hsa-miR-551b-5p</i>       | ['GINS4', 'LPCAT1', 'TMPO', 'ZNF185', 'TOP2A', 'MTDH', 'WDHD1', 'CBX3', 'HMGB2']                                                                             |
| <i>hsa-miR-93-5p</i>         | ['FXD3', 'CFL2', 'PTGIS', 'PDLIM4', 'PARVA', 'MYADM', 'TGFB11', 'PTRF', 'TNKS1BP1', 'PRELP', 'CNN1', 'ALOX15B', 'TNS1']                                      |

## correlated in both PC and CRPC

|                              |                                                                                                                    |
|------------------------------|--------------------------------------------------------------------------------------------------------------------|
| <i>hsa-miR-101-3p</i>        | ['GINS4', 'EIF5', 'TMEM65', 'STMN1', 'VCAN']                                                                       |
| <b><i>hsa-miR-23a-3p</i></b> | ['FANCD2', 'TMPO', 'OGT', 'DDX39B', 'EIF5', 'TOP2A', 'MTDH', 'XPNPEP3', 'PNN', 'HMGB2', 'SSBP1']                   |
| <i>hsa-miR-23b-3p</i>        | ['LMNB1', 'CPOX', 'MCM4', 'FANCD2', 'TMPO', 'DDX39B', 'EIF5', 'TOP2A', 'MTDH', 'XPNPEP3', 'PNN', 'NCAPG', 'HMGB2'] |
| <i>hsa-miR-424-3p</i>        | ['NFIX']                                                                                                           |
| <i>hsa-miR-454-3p</i>        | ['KIAA1210', 'PARVA', 'MAP2K1', 'MYADM', 'TNS1', 'GNAO1']                                                          |

Supplementary Table 7. miRNAs and their negatively correlating (<-0.50) targets as identified based on differential protein expression

**miRNA correlating protein**

*differentially expressed miRNAs in italics*

miRNAs identified in several analyses highlighted with colour.

| correlated in PC |                                                                             |
|------------------|-----------------------------------------------------------------------------|
| hsa-miR-1255a    | ['AOC3', 'GNAO1', 'PARVA', 'CNP', 'ATP2A2']                                 |
| hsa-miR-1289     | ['CDV3', 'PARVA', 'ATP2A2']                                                 |
| hsa-miR-2355-3p  | ['CD109', 'SEC24C', 'ERLIN2']                                               |
| hsa-miR-23b-5p   | ['HDGF', 'CALU']                                                            |
| hsa-miR-25-5p    | ['ARHGAP1', 'ATL3', 'VWA1', 'LIMS2']                                        |
| hsa-miR-3065-5p  | ['SRSF1', 'NUDT21', 'MATR3', 'TCOF1', 'SRSF7', 'MIA3']                      |
| hsa-miR-3180-3p  | ['GNAO1', 'ATP2A2', 'TGFB11']                                               |
| hsa-miR-3200-3p  | ['PLG', 'SEC14L2', 'VCL']                                                   |
| hsa-miR-4485     | ['BCLAF1', 'MMAB']                                                          |
| hsa-miR-561-5p   | ['SEC24A', 'SDC1', 'PARVA', 'ATP2A2', 'NXN', 'FERMT2', 'PRKAR2A', 'COL1A1'] |
| hsa-miR-5688     | ['DERL1', 'VDAC2', 'NUDCD1']                                                |
| hsa-miR-618      | ['ACPP', 'RPL23A']                                                          |
| hsa-miR-96-5p    | ['LDB3', 'LPP', 'VCL', 'LAMC1', 'PGM5', 'PALLD']                            |

**correlated in CRPC**

|                         |                                                                                                  |
|-------------------------|--------------------------------------------------------------------------------------------------|
| <i>hsa-miR-106b-5p</i>  | ['FOXA1', 'ARHGAP1', 'PARVA', 'LASP1', 'TNS1', 'PGM5', 'PALLD']                                  |
| <i>hsa-miR-1262</i>     | ['PPP2R5D', 'PAICS', 'MXRA7', 'CCT6A', 'COPA']                                                   |
| hsa-miR-1285-3p         | ['ACADSB', 'ATP2B4', 'XPNEP3', 'OXSR1', 'B4GALT5', 'RDH11', 'ALDH6A1']                           |
| hsa-miR-136-5p          | ['AGL', 'LDB3', 'TFRC', 'PGM3', 'DCP1A', 'AP1G1']                                                |
| hsa-miR-197-5p          | ['ACADSB', 'PFDN2', 'ADH1B', 'RAC2', 'NCSTN']                                                    |
| <i>hsa-miR-222-3p</i>   | ['SNRPD3', 'MTDH', 'SUB1', 'SRSF1', 'TFRC', 'FUBP1', 'ATP1B1', 'CAPRIN1', 'STMN1']               |
| <i>hsa-miR-22-3p</i>    | ['KHSRP', 'RAB3B', 'PFDN6', 'B4GALT5', 'GUK1', 'SERBP1', 'MDH2']                                 |
| hsa-miR-29a-3p          | ['HDGF', 'LAMTOR1', 'SUB1', 'FUBP1', 'TCOF1', 'ATP1B1', 'CAPRIN1']                               |
| hsa-miR-3130-5p         | ['BROX', 'PARVA', 'MYLK', 'VCL', 'AP1G1', 'SERPINA7']                                            |
| hsa-miR-3135a           | ['XPNEP3', 'MATR3', 'SMN1', 'CPE']                                                               |
| <i>hsa-miR-3150a-5p</i> | ['GMDS', 'SNTB2', 'PPP2R4']                                                                      |
| hsa-miR-3155a           | ['HECTD3', 'CNBP', 'FABP3', 'MXRA7', 'TOM1L2', 'TTC38', 'TOLLIP']                                |
| hsa-miR-326             | ['OGDH', 'PPP2R5D', 'ATP2B4', 'OXSR1', 'ATP2A2', 'ERLIN2']                                       |
| <b>hsa-miR-3921</b>     | ['SORBS1', 'ARHGAP1', 'ACTN1', 'COMT', 'PARVA', 'ILK', 'PGM3', 'PYGB', 'MSN', 'EHD2', 'PRKAR2A'] |
| hsa-miR-432-3p          | ['UAP1', 'SDC1', 'CD276', 'CD34', 'KIF2A']                                                       |
| hsa-miR-4454            | ['ARHGAP1', 'PYGB', 'MSN']                                                                       |
| hsa-miR-450a-5p         | ['CCT6A', 'SNTB2']                                                                               |
| hsa-miR-4732-3p         | ['EMIL2', 'CDV3', 'MXRA7', 'NENF', 'MAP4', 'ZNF512']                                             |
| hsa-miR-4772-3p         | ['ATP6V1C1', 'XPNEP3', 'PDCD6IP', 'SUB1', 'GNA11', 'MATR3', 'TOR1AIP1']                          |
| hsa-miR-4783-3p         | ['ATP6V1C1', 'XPNEP3', 'GNA11', 'TOM1L2']                                                        |
| hsa-miR-485-5p          | ['MPI', 'CNBP', 'B4GALT5', 'MXRA7', 'TOM1L2', 'TOLLIP']                                          |
| hsa-miR-490-5p          | ['BID', 'LDB3', 'GNAO1', 'PARVA', 'FERMT2', 'AP1G1']                                             |
| <i>hsa-miR-493-5p</i>   | ['AGL', 'PPP2R5D', 'ATL3', 'GBE1', 'ATP2A2', 'DNM1L', 'OLA1']                                    |
| hsa-miR-629-3p          | ['VASP', 'GNAO1', 'SEC14L2', 'MXRA7']                                                            |
| hsa-miR-7-5p            | ['RPP30', 'GNAO1', 'PSME3', 'ANXA11']                                                            |
| hsa-miR-873-3p          | ['CNBP', 'CNP', 'B4GALT5', 'MXRA7', 'TTC38']                                                     |

**correlated in both PC and CRPC**

|                         |                                                                                                                                                                                                                    |
|-------------------------|--------------------------------------------------------------------------------------------------------------------------------------------------------------------------------------------------------------------|
| hsa-miR-130a-3p         | ['OGDH', 'HADHA', 'TOM1L2', 'CAB39L']                                                                                                                                                                              |
| hsa-miR-132-3p          | ['HBD', 'VDAC2', 'FUBP1', 'FUS', 'CAPRIN1']                                                                                                                                                                        |
| hsa-miR-200c-3p         | ['SEC24A', 'PARVA', 'SACM1L', 'ATP2A2', 'PSMF1', 'DSTN', 'FERMT2', 'NUP153', 'MSN', 'IQGAP1']                                                                                                                      |
| hsa-miR-21-5p           | ['LPP', 'SNTB2']                                                                                                                                                                                                   |
| <i>hsa-miR-3150a-5p</i> | ['GMDS']                                                                                                                                                                                                           |
| hsa-miR-3175            | ['LDB3', 'GNAO1', 'CSRP1', 'TNS1', 'DPYSL3', 'TLN1', 'EHD2']                                                                                                                                                       |
| <b>hsa-miR-3921</b>     | ['ARHGAP1', 'TGFB11', 'PRKAR2A']                                                                                                                                                                                   |
| hsa-miR-5706            | ['ENTPD1', 'KIF2A']                                                                                                                                                                                                |
| <i>hsa-miR-625-3p</i>   | ['SEC24A', 'SNX2', 'PDLIM5', 'COPA', 'PAFAH1B2']                                                                                                                                                                   |
| hsa-miR-92a-1-5p        | ['FOXA1', 'DPT', 'RCN3', 'CD82']                                                                                                                                                                                   |
| <i>hsa-miR-93-5p</i>    | ['GSTM3', 'VASP', 'ALDH1A3', 'LDB3', 'ARHGAP1', 'PARVA', 'ATL3', 'SNX2', 'TNS1', 'DNM1L', 'LPP', 'GNA11', 'CMPK1', 'TGFB11', 'CLTC', 'FAM129A', 'STARD10', 'SNTB2', 'RNH1', 'PGM5', 'PALLD', 'PRKAR1A', 'PRKAR2A'] |
| <i>hsa-miR-99b-3p</i>   | ['SEC24A', 'ATP2B4', 'FAM129A']                                                                                                                                                                                    |



Supplementary Table 8. Genes regulated by differentially expressed miRNAs according to both mRNA and protein expression

|          |          |          |
|----------|----------|----------|
| ACO2     | FNBP1    | SEC14L2  |
| ACPP     | GLG1     | SEC24C   |
| ACSL3    | GNAO1    | SH2D4A   |
| AGL      | GNE      | SNRPE    |
| AK4      | GOLIM4   | SNRPF    |
| ALAD     | GPD1L    | SNTB2    |
| ALDH1A2  | GSK3B    | SNX1     |
| ANXA11   | HMGB2    | SORBS1   |
| AP3S2    | HNMT     | SPARC    |
| ARHGAP1  | HSPB6    | SRSF1    |
| ATP2A2   | ICAM1    | SSBP1    |
| ATP2B4   | KIAA1468 | STARD10  |
| ATP6V1C1 | L2HGDH   | STK39    |
| B4GALT5  | LAMP2    | STMN1    |
| BCAS1    | LDB3     | SURF4    |
| CACYBP   | LMNB1    | SYNPO2   |
| CANX     | LMOD1    | TBXAS1   |
| CBR1     | LPP      | TES      |
| CCT5     | LRPPRC   | TGFB111  |
| CCT6A    | LRRC59   | TLN1     |
| CD59     | MAN2B2   | TMEM35   |
| CFL2     | MAT2A    | TMEM65   |
| CHERP    | MTDH     | TMPO     |
| CLIC4    | MYLK     | TNS1     |
| CNN1     | NCLN     | TOM1L2   |
| COL1A2   | NDUFA10  | TPM1     |
| COL3A1   | NLN      | TRA2B    |
| COMT     | OXSR1    | TRIM25   |
| CORO1B   | PARVA    | TTC38    |
| COX20    | PFKP     | TTLL12   |
| CPD      | PGM5     | UFL1     |
| CRYM     | PKP1     | VASP     |
| CTSB     | PLS3     | VCAN     |
| CTTN     | PNN      | VCL      |
| DBI      | PPP1CB   | VKORC1L1 |
| DKC1     | PPP1R12B | XPNPEP3  |
| DPYSL3   | PYCRL    | XPO1     |
| DUSP3    | PYGB     | ZNF185   |
| EML4     | RDH11    |          |
| ENDOD1   | RSU1     |          |
| FAM129A  | SAR1B    |          |
| FERMT2   | SCARB2   |          |

Supplementary Table 9. Differentially expressed genes regulated by differentially expressed miRNAs according to mRNA expression data

|          |          |          |
|----------|----------|----------|
| ABAT     | ITGA5    | SEC14L2  |
| ACADSB   | KIAA1210 | SLC44A4  |
| ACPP     | KRT17    | SLC4A1   |
| AIDA     | LDB3     | SLC9A3R2 |
| ALDH1A2  | LMNB1    | SMC4     |
| ALOX15B  | LMOD1    | SNRPF    |
| ANPEP    | LPCAT1   | SORBS1   |
| AR       | LSAMP    | SSBP1    |
| ARG2     | MAN2B2   | STARD10  |
| ARL6IP5  | MAP2K1   | STMN1    |
| ARRB1    | MCM4     | SYNM     |
| BAIAP2   | MCM7     | SYNPO    |
| C16orf58 | MME      | TACSTD2  |
| CACNA2D1 | MPDU1    | TGFB111  |
| CAP2     | MRPL15   | TLN1     |
| CBX3     | MTDH     | TMEM35   |
| CCT6A    | MTHFD1L  | TMEM65   |
| CDC42EP4 | MYADM    | TMPO     |
| CFL2     | MYH11    | TMPRSS2  |
| CHORDC1  | MYLK     | TNS1     |
| CNN1     | NCAPG    | TOP2A    |
| COG3     | NCAPH    | TRIM25   |
| COMT     | NDRG2    | UAP1L1   |
| CPOX     | NEBL     | UBR5     |
| CRYM     | NFIX     | VCAN     |
| DDX39B   | OGT      | VDAC3    |
| DNAJC7   | ORM1     | WDHD1    |
| EIF5     | PARVA    | XPNPEP3  |
| ENDOD1   | PBK      | XPO1     |
| FANCD2   | PDLIM4   | YWHAZ    |
| FXYD3    | PEBP4    | ZNF185   |
| GINS4    | PGM5     |          |
| GLIPR2   | PKP1     |          |
| GNAO1    | PNN      |          |
| GOLM1    | PPP1R12B |          |
| GRB10    | PRELP    |          |
| GTPBP10  | PRSS8    |          |
| HEXA     | PTGIS    |          |
| HMGB2    | PTRF     |          |
| HNRNPA1  | PYGB     |          |
| HSPB6    | REEP6    |          |
| HSPD1    | RRS1     |          |

Supplementary Table 10. Differentially expressed genes regulated by differentially expressed miRNAs according to protein expression data

|          |         |           |
|----------|---------|-----------|
| ACO2     | CNBP    | HADHA     |
| ACPP     | CNP     | HBB       |
| ACSL3    | CNPY2   | HBD       |
| ACTN1    | CNPY4   | HDLBP     |
| ADH1B    | COL1A1  | HID1      |
| ADH5     | COL1A2  | HLA-DRB1  |
| AGL      | COL3A1  | HNMT      |
| ALDH1A3  | COMT    | HNRNPU    |
| ALDH6A1  | COMTD1  | HSPA1B    |
| ALYREF   | COPA    | IFITM1    |
| ANP32B   | COPG1   | IQGAP1    |
| ANXA11   | CORO1B  | IQGAP2    |
| ANXA4    | COX5A   | KHSRP     |
| ANXA6    | CRYM    | KLK11     |
| AP1G1    | CSRP1   | LACTB2    |
| ARHGAP1  | CYFIP1  | LAMTOR1   |
| ATL3     | DCP1A   | LASP1     |
| ATP1B1   | DDX19A  | LDB3      |
| ATP2A2   | DERL1   | LPP       |
| ATP2B4   | DNM1L   | MAN2B2    |
| ATP6V1C1 | DPP4    | MAP4      |
| AZGP1    | DPYSL3  | MATR3     |
| B4GALT5  | DSTN    | MDH2      |
| BCLAF1   | DUSP3   | MIA3      |
| BID      | EHD2    | MMAB      |
| BST2     | EIF5A   | MPI       |
| BZW1     | EMILIN1 | MRPL12    |
| CAB39L   | ENTPD1  | MSN       |
| CALU     | ERH     | MTDH      |
| CAPRIN1  | FABP3   | MXRA7     |
| CBR1     | FAM129A | MYL12A    |
| CCDC124  | FAM98B  | MYLK      |
| CCT6A    | FERMT2  | NACA      |
| CD109    | FKBP11  | NANS      |
| CD276    | FLNB    | NDUFA10   |
| CD82     | FOXA1   | NHP2L1    |
| CFHR1    | FUBP1   | NIPSNAP3A |
| CKB      | FUS     | NPM1      |
| CLNS1A   | GGT1    | NUDT21    |
| CLTC     | GNA11   | NXN       |
| CLU      | GNAO1   | OLA1      |
| CMPK1    | GSTM3   | OTUB1     |

|          |
|----------|
| OXSR1    |
| PACSLN2  |
| PAFAH1B2 |
| PAICS    |
| PALLD    |
| PARVA    |
| PCBP2    |
| PDCD6IP  |
| PDLIM5   |
| PFDN6    |
| PGM3     |
| PGM5     |
| PLG      |
| PPIL1    |
| PPP2R5D  |
| PPP3CA   |
| PPP6R3   |
| PRAF2    |
| PRKACA   |
| PRKAR1A  |
| PRKAR2A  |
| PRKCSH   |
| PSMD10   |
| PSME3    |
| PSMF1    |
| PTMA     |
| PTMS     |
| PYGB     |
| RAB7A    |
| RBMX     |
| RCN3     |
| RDH11    |
| RNH1     |
| RPL23A   |
| RPP30    |
| SACM1L   |
| SAFB     |
| SAR1B    |
| SEC14L2  |
| SEC24A   |
| SEC24C   |
| SERBP1   |
| SERPINA1 |
| SH3BGRL3 |
| SMN1     |

|         |
|---------|
| SNRPD3  |
| SNRPE   |
| SNRPF   |
| SNTB2   |
| SNX2    |
| SORBS1  |
| SPARC   |
| SRSF1   |
| SRSF2   |
| SRSF7   |
| SSBP1   |
| STARD10 |
| STIP1   |
| STMN1   |
| STXBP3  |
| SUB1    |
| SURF4   |
| TAGLN   |
| TARDBP  |
| TCEA1   |
| TFRC    |
| TGFB111 |
| THY1    |
| TIMM9   |
| TLN1    |
| TM9SF2  |
| TMPO    |
| TNS1    |
| TOM1L2  |
| TOMM20  |
| TOMM22  |
| TOMM40  |
| TPD52L2 |
| TTC38   |
| TXNL1   |
| UCHL3   |
| VASP    |
| VCAN    |
| VCL     |
| VDAC1   |
| VDAC2   |
| WDR1    |
| VIM     |
| VTA1    |
| XPNPEP3 |

|        |
|--------|
| XRCC5  |
| ZNF512 |

| Supplementary Table 11. Most significantly (p<0.05) altered pathways based on proteomics data by Ingenuity Pathway Analysis. |               |                                                       |               |
|------------------------------------------------------------------------------------------------------------------------------|---------------|-------------------------------------------------------|---------------|
| Common pathways in bold                                                                                                      |               |                                                       |               |
| PC vs. BPH                                                                                                                   |               | CRPC vs. PC                                           |               |
|                                                                                                                              | -log(p-value) |                                                       | -log(p-value) |
| IPA pathway                                                                                                                  |               | IPA pathway                                           |               |
| EIF2 Signaling                                                                                                               | 13.7          | ILK Signaling                                         | 7.91E+00      |
| Regulation of eIF4 and p70S6K Signaling                                                                                      | 9.11          | Glycogen Degradation II                               | 6.04E+00      |
| FXR/RXR Activation                                                                                                           | 8.06          | Glycogen Degradation III                              | 5.61E+00      |
| Caveolar-mediated Endocytosis Signaling                                                                                      | 7.93          | GDP-glucose Biosynthesis                              | 5.40E+00      |
| LXR/RXR Activation                                                                                                           | 7.61          | Noradrenaline and Adrenaline Degradation              | 5.25E+00      |
| Isoleucine Degradation I                                                                                                     | 6.86          | Glucose and Glucose-1-phosphate Degradation           | 5.11E+00      |
| Colanic Acid Building Blocks Biosynthesis                                                                                    | 6.86          | Dopamine Receptor Signaling                           | 4.84E+00      |
| GDP-mannose Biosynthesis                                                                                                     | 6.59          | TCA Cycle II (Eukaryotic)                             | 4.25E+00      |
| Clathrin-mediated Endocytosis Signaling                                                                                      | 6.48          | Actin Cytoskeleton Signaling                          | 4.24E+00      |
| Fatty Acid $\beta$ -oxidation I                                                                                              | 6.11          | Tight Junction Signaling                              | 4.14E+00      |
| Atherosclerosis Signaling                                                                                                    | 6.01          | Mitochondrial Dysfunction                             | 4.04E+00      |
| Valine Degradation I                                                                                                         | 5.95          | Caveolar-mediated Endocytosis Signaling               | 3.46E+00      |
| Acute Phase Response Signaling                                                                                               | 5.92          | Ethanol Degradation II                                | 3.35E+00      |
| mTOR Signaling                                                                                                               | 5.81          | UDP-N-acetyl-D-galactosamine Biosynthesis II          | 3.31E+00      |
| Actin Cytoskeleton Signaling                                                                                                 | 5.35          | NRF2-mediated Oxidative Stress Response               | 3.24E+00      |
| Leucine Degradation I                                                                                                        | 5.31          | Calcium Transport I                                   | 3.16E+00      |
| Telomere Extension by Telomerase                                                                                             | 5.25          | Netrin Signaling                                      | 3.13E+00      |
| TCA Cycle II (Eukaryotic)                                                                                                    | 5.12          | Tryptophan Degradation X (Mammalian, via Tryptamin    | 3.10E+00      |
| Ketogenesis                                                                                                                  | 5.02          | Neuroprotective Role of THOP1 in Alzheimer's Disease  | 3.08E+00      |
| Unfolded protein response                                                                                                    | 4.94          | D-glucuronate Degradation I                           | 2.99E+00      |
| Signaling by Rho Family GTPases                                                                                              | 4.79          | Virus Entry via Endocytic Pathways                    | 2.86E+00      |
| Aggrin Interactions at Neuromuscular Junction                                                                                | 4.73          | Serotonin Degradation                                 | 2.81E+00      |
| Integrin Signaling                                                                                                           | 4.58          | Remodeling of Epithelial Adherens Junctions           | 2.78E+00      |
| Complement System                                                                                                            | 4.57          | Dopamine Degradation                                  | 2.77E+00      |
| Glutaryl-CoA Degradation                                                                                                     | 4.55          | Integrin Signaling                                    | 2.75E+00      |
| D-glucuronate Degradation I                                                                                                  | 4.41          | Intrinsic Prothrombin Activation Pathway              | 2.71E+00      |
| Intrinsic Prothrombin Activation Pathway                                                                                     | 4.4           | Isoleucine Degradation I                              | 2.70E+00      |
| Hepatic Fibrosis / Hepatic Stellate Cell Activation                                                                          | 4.28          | CDK5 Signaling                                        | 2.60E+00      |
| Regulation of Actin-based Motility by Rho                                                                                    | 4.25          | CMP-N-acetylneuraminate Biosynthesis I (Eukaryotes)   | 2.48E+00      |
| RhoA Signaling                                                                                                               | 4.18          | Cardiac $\beta$ -adrenergic Signaling                 | 2.46E+00      |
| Remodeling of Epithelial Adherens Junctions                                                                                  | 4.04          | Histamine Degradation                                 | 2.45E+00      |
| Epithelial Adherens Junction Signaling                                                                                       | 3.88          | Valine Degradation I                                  | 2.37E+00      |
| NRF2-mediated Oxidative Stress Response                                                                                      | 3.86          | UDP-N-acetyl-D-glucosamine Biosynthesis II            | 2.31E+00      |
| Ketolysis                                                                                                                    | 3.84          | Granzyme A Signaling                                  | 2.24E+00      |
| Leukocyte Extravasation Signaling                                                                                            | 3.84          | Regulation of eIF4 and p70S6K Signaling               | 2.21E+00      |
| Glycolysis I                                                                                                                 | 3.82          | Protein Kinase A Signaling                            | 2.21E+00      |
| Gluconeogenesis I                                                                                                            | 3.82          | Putrescine Degradation III                            | 2.18E+00      |
| ILK Signaling                                                                                                                | 3.72          | Acetyl-CoA Biosynthesis I (Pyruvate Dehydrogenase Co  | 2.17E+00      |
| RhoGDI Signaling                                                                                                             | 3.57          | IL-1 Signaling                                        | 2.15E+00      |
| Mechanisms of Viral Exit from Host Cells                                                                                     | 3.39          | Clathrin-mediated Endocytosis Signaling               | 2.10E+00      |
| Granzyme A Signaling                                                                                                         | 3.35          | LPS/IL-1 Mediated Inhibition of RXR Function          | 2.07E+00      |
| Tryptophan Degradation III (Eukaryotic)                                                                                      | 3.25          | Dopamine-DARPP32 Feedback in cAMP Signaling           | 1.97E+00      |
| Mevalonate Pathway I                                                                                                         | 3.14          | Ketolysis                                             | 1.94E+00      |
| Virus Entry via Endocytic Pathways                                                                                           | 3.07          | Signaling by Rho Family GTPases                       | 1.90E+00      |
| Coagulation System                                                                                                           | 2.99          | Ketogenesis                                           | 1.85E+00      |
| Acetyl-CoA Biosynthesis I (Pyruvate Dehydrogenase Co                                                                         | 2.91          | Amyloid Processing                                    | 1.83E+00      |
| RAN Signaling                                                                                                                | 2.77          | Aryl Hydrocarbon Receptor Signaling                   | 1.80E+00      |
| tRNA Charging                                                                                                                | 2.73          | Glutathione-mediated Detoxification                   | 1.79E+00      |
| Aldosterone Signaling in Epithelial Cells                                                                                    | 2.7           | Ceramide Signaling                                    | 1.78E+00      |
| Superpathway of Geranylgeranyldiphosphate Biosynth                                                                           | 2.66          | Androgen Signaling                                    | 1.75E+00      |
| Superpathway of Cholesterol Biosynthesis                                                                                     | 2.65          | Sonic Hedgehog Signaling                              | 1.75E+00      |
| phagosome maturation                                                                                                         | 2.6           | D-mannose Degradation                                 | 1.73E+00      |
| Actin Nucleation by ARP-WASP Complex                                                                                         | 2.57          | Sertoli Cell-Sertoli Cell Junction Signaling          | 1.73E+00      |
| Protein Ubiquitination Pathway                                                                                               | 2.56          | Role of CHK Proteins in Cell Cycle Checkpoint Control | 1.72E+00      |
| 5-aminoimidazole Ribonucleotide Biosynthesis I                                                                               | 2.47          | Glutaryl-CoA Degradation                              | 1.70E+00      |
| Thiosulfate Disproportionation III (Rhodanese)                                                                               | 2.47          | BER pathway                                           | 1.70E+00      |
| Glutathione Redox Reactions I                                                                                                | 2.47          | Mevalonate Pathway I                                  | 1.63E+00      |
| VEGF Signaling                                                                                                               | 2.4           | mTOR Signaling                                        | 1.62E+00      |
| Huntington's Disease Signaling                                                                                               | 2.29          | ERK/MAPK Signaling                                    | 1.62E+00      |
| Purine Nucleotides De Novo Biosynthesis II                                                                                   | 2.28          | CTLA4 Signaling in Cytotoxic T Lymphocytes            | 1.61E+00      |
| Methylmalonyl Pathway                                                                                                        | 2.18          | G Beta Gamma Signaling                                | 1.61E+00      |
| Proline Biosynthesis I                                                                                                       | 2.18          | RhoA Signaling                                        | 1.57E+00      |
| Paxillin Signaling                                                                                                           | 2.14          | Cell Cycle Regulation by BTG Family Proteins          | 1.57E+00      |
| LPS/IL-1 Mediated Inhibition of RXR Function                                                                                 | 2.09          | DNA Double-Strand Break Repair by Non-Homologous      | 1.57E+00      |
| Germ Cell-Sertoli Cell Junction Signaling                                                                                    | 2.08          | Colanic Acid Building Blocks Biosynthesis             | 1.57E+00      |
| Glycogen Degradation III                                                                                                     | 2.07          | Regulation of Actin-based Motility by Rho             | 1.56E+00      |
| Noradrenaline and Adrenaline Degradation                                                                                     | 2.06          | Atherosclerosis Signaling                             | 1.54E+00      |
| Rac Signaling                                                                                                                | 2.06          | Germ Cell-Sertoli Cell Junction Signaling             | 1.52E+00      |
| Neuregulin Signaling                                                                                                         | 2.01          | Telomere Extension by Telomerase                      | 1.51E+00      |
| DNA Double-Strand Break Repair by Non-Homologous                                                                             | 1.97          | Leukotriene Biosynthesis                              | 1.51E+00      |
| 2-oxobutanoate Degradation I                                                                                                 | 1.97          | Vitamin-C Transport                                   | 1.51E+00      |
| Tight Junction Signaling                                                                                                     | 1.94          | Xenobiotic Metabolism Signaling                       | 1.50E+00      |
| UDP-N-acetyl-D-glucosamine Biosynthesis II                                                                                   | 1.81          | Leukocyte Extravasation Signaling                     | 1.49E+00      |
| Glycogen Biosynthesis II (from UDP-D-Glucose)                                                                                | 1.81          | Cellular Effects of Sildenafil (Viagra)               | 1.47E+00      |
| Production of Nitric Oxide and Reactive Oxygen Species                                                                       | 1.7           | Methylglyoxal Degradation III                         | 1.46E+00      |
| p70S6K Signaling                                                                                                             | 1.7           | $\beta$ -alanine Degradation I                        | 1.43E+00      |
| Aryl Hydrocarbon Receptor Signaling                                                                                          | 1.68          | Proline Degradation                                   | 1.43E+00      |
| Eicosanoid Signaling                                                                                                         | 1.68          | L-DOPA Degradation                                    | 1.43E+00      |
| Glucocorticoid Receptor Signaling                                                                                            | 1.59          | 4-hydroxyproline Degradation I                        | 1.43E+00      |
| Glucose and Glucose-1-phosphate Degradation                                                                                  | 1.55          | GDP-L-fucose Biosynthesis I (from GDP-D-mannose)      | 1.43E+00      |
| CTLA4 Signaling in Cytotoxic T Lymphocytes                                                                                   | 1.53          | Formaldehyde Oxidation II (Glutathione-dependent)     | 1.43E+00      |
| Ethanol Degradation II                                                                                                       | 1.53          | Glycine Biosynthesis I                                | 1.43E+00      |
| Mitochondrial Dysfunction                                                                                                    | 1.5           | Superpathway of Geranylgeranyldiphosphate Biosynth    | 1.41E+00      |
| Cellular Effects of Sildenafil (Viagra)                                                                                      | 1.5           | Paxillin Signaling                                    | 1.39E+00      |
| Phospholipase C Signaling                                                                                                    | 1.5           | Mechanisms of Viral Exit from Host Cells              | 1.39E+00      |
| Acetyl-CoA Biosynthesis III (from Citrate)                                                                                   | 1.47          | Relaxin Signaling                                     | 1.39E+00      |
| Melatonin Degradation III                                                                                                    | 1.47          | Melatonin Signaling                                   | 1.38E+00      |
| Sorbitol Degradation I                                                                                                       | 1.47          | GPCR-Mediated Integration of Enteroendocrine Signalin | 1.36E+00      |
| D-mannose Degradation                                                                                                        | 1.47          | RhoGDI Signaling                                      | 1.36E+00      |
| Ephrin Receptor Signaling                                                                                                    | 1.46          | Oxidative Ethanol Degradation III                     | 1.32E+00      |
| Prostanoid Biosynthesis                                                                                                      | 1.45          |                                                       |               |
| UDP-N-acetyl-D-galactosamine Biosynthesis II                                                                                 | 1.45          |                                                       |               |
| Pyrimidine Deoxyribonucleotides De Novo Biosynthesis                                                                         | 1.43          |                                                       |               |
| Ephrin B Signaling                                                                                                           | 1.43          |                                                       |               |
| Axonal Guidance Signaling                                                                                                    | 1.4           |                                                       |               |
| Tryptophan Degradation X (Mammalian, via Tryptamin                                                                           | 1.38          |                                                       |               |
| Inhibition of Matrix Metalloproteases                                                                                        | 1.38          |                                                       |               |
| Xenobiotic Metabolism Signaling                                                                                              | 1.35          |                                                       |               |
| Neuroprotective Role of THOP1 in Alzheimer's Disease                                                                         | 1.34          |                                                       |               |

Supplementary Table 12. MicroLC-MSTrap targeted proteins/peptides and peptide specific information.

| protein | peptide sequence                          | parent ion (m/z) | fragment 1 (m/z) | fragment 2 (m/z) | fragment 3 (m/z) |
|---------|-------------------------------------------|------------------|------------------|------------------|------------------|
| MDH2 A  | ANTFVAELK                                 | 496,77           | 807,4611         | 706,4134         | 559,345          |
|         | H-ANTFVAEL(K <sub>C13N15</sub> )-OH       | 500,7813         | 815,4753         | 714,4276         | 567,3592         |
| MDH2 B  | VNPVIGGHAGK                               | 383,2243         | 639,3573         | 526,2732         | 738,4257         |
|         | H-VNPVIGGHAG(K <sub>C13N15</sub> )-OH     | 385,8957         | 647,3715         | 534,2874         | 746,4399         |
| KHSRP A | VQISPDSGGLPER                             | 677,8517         | 927,453          | 715,3733         | 1014,485         |
|         | H-VQISPDSGGLPE(R <sub>C13N15</sub> )-OH   | 682,8558         | 937,4613         | 725,3816         | 1024,493         |
| KHSRP B | IINDLLQSLR                                | 592,8535         | 958,5316         | 729,4617         | 616,3777         |
|         | H-IINDLLQSL(R <sub>C13N15</sub> )-OH      | 597,8576         | 968,5399         | 739,47           | 626,386          |
| DNM1L A | SSVLESLVGR                                | 523,7957         | 773,4516         | 660,3675         | 531,3249         |
|         | H-SSVLESLVG(R <sub>C13N15</sub> )-OH      | 528,7998         | 783,4598         | 670,3758         | 541,3332         |
| DNM1L B | SATLLQLITK                                | 544,3397         | 715,4713         | 828,5553         | 929,603          |
|         | H-SATLLQLIT(K <sub>C13N15</sub> )-OH      | 548,3468         | 723,4855         | 836,5695         | 937,6172         |
| OLA1 A  | IGIVGLPNVGK                               | 533,8343         | 783,4723         | 684,4039         | 514,2984         |
|         | H-IGIVGLPNVG(K <sub>C13N15</sub> )-OH     | 537,8417         | 791,4865         | 692,4181         | 522,3126         |
| OLA1 B  | IPAFNLVVDIAGLVK                           | 784,9742         | 814,5033         | 1027,615         | 487,3239         |
|         | H-IPAFNLVVDIAGLV(K <sub>C13N15</sub> )-OH | 788,9813         | 822,5175         | 1035,629         | 495,3381         |
