# Supplementary material for: Integrative proteomics in prostate cancer uncovers robustness against genomic and transcriptomic aberrations during disease progression
Source: PubMed Central journal article supplement (PMC5862881; doi:10.1038/s41467-018-03573-6), 2018-03-21
Supplement: 41467_2018_3573_MOESM3_ESM.pdf [file 41467_2018_3573_MOESM3_ESM.pdf]

## **Description of Additional Supplementary Files**

File Name: Supplementary Data 1

Description: Original mass spectrometry data.

File Name: Supplementary Data 2

Description: All proteins and number of unique peptides used in quantification of proteins.

File Name: Supplementary Data 3

Description: Genes regulated by differentially expressed miRNAs according to Mrna expression.

File Name: Supplementary Data 4

Description: Genes regulated by differentially expressed miRNAs according to protein expression.
